# 1 **A quantitative assessment of *Staphylococcus aureus* community** 2 **carriage in Yuma, Arizona**

3 Short title: Community carriage of *S. aureus*

4 Benjamin Russakoff<sup>1</sup>, Colin Wood<sup>1</sup>, Monica R. Lininger<sup>2</sup>, Steven D. Barger<sup>3</sup>, Robert T. Trotter  
5 II<sup>4</sup>, Sara Maltinsky<sup>1</sup>, Mimi Mbegbu<sup>1</sup>, Briana Coyne<sup>1</sup>, David Panisello Yague<sup>1</sup>, Shari Kyman<sup>1</sup>, Kara  
6 Tucker-Morgan<sup>5</sup>, Kathya Cenicerros<sup>5</sup>, Cristina Padilla<sup>5</sup>, Kevin Hurtado<sup>5</sup>, Ashley Menard<sup>5</sup>,  
7 Francisco Villa<sup>5</sup>, Heidi A. Wayment<sup>3</sup>, Crystal Hepp<sup>6</sup>, Tara Furstenau<sup>6</sup>, Viacheslav Fofanov<sup>6</sup>,  
8 Cindy M. Liu<sup>7</sup>, Talima Pearson<sup>1\*</sup>

9 Affiliations:

- 10 1. Pathogen & Microbiome Institute, Northern Arizona University, Flagstaff, Arizona, USA.
- 11 2. Department of Physical Therapy and Athletic Training, Northern Arizona University,  
12 Flagstaff, Arizona, USA
- 13 3. Department of Psychological Sciences, Northern Arizona University, Flagstaff, Arizona,  
14 USA
- 15 4. Department of Anthropology, Northern Arizona University, Flagstaff, Arizona, USA
- 16 5. Northern Arizona University-Yuma, Yuma, Arizona, USA
- 17 6. School of Informatics, Computing, and Cyber Systems, Northern Arizona University,  
18 Flagstaff, Arizona, USA.
- 19 7. Department of Environmental and Occupational Health, Milken Institute School of Public  
20 Health, George Washington University, Washington, DC, USA

21

22 \* Corresponding author: [Talima.Pearson@NAU.edu](mailto:Talima.Pearson@NAU.edu)

23

24

25  
26  
27  
28  
29  
30  
31  
32  
33  
34  
35  
36

## Acknowledgements

This work would not have been possible without the support from the Regional Center for Border Health in Somerton, AZ. We are grateful to the many field surveyors from NAU and the Regional Center for Border Health who recruited, sampled, and collected data from participants. This work was supported by the NAU Southwest Health Equity Research Collaborative, which is funded by the National Institute on Minority Health and Health Disparities at the National Institutes of Health (U54MD012388). Funding was also received from the National Institute of Allergy and Infectious Diseases at the National Institutes of Health (R15AI156771). The funders had no role in study design, data collection and analysis, decision to publish, or preparation of the manuscript.

37  
38  
39  
40  
41  
42  
43  
44  
45  
46  
47  
48  
49  
50  
51  
52  
53  
54  
55  
56  
57  
58  
59

### ABSTRACT (300)

*Staphylococcus aureus* is a frequent cause of mild and severe infections that occur when these commensal bacteria penetrate the outer layers of skin or mucosa. As most *S. aureus* infections are the result of autoinfection, and community-acquired infections are increasingly common, it is important to better understand *S. aureus* colonization characteristics in the community setting. Using standard culture technique and a quantitative PCR assay (SaQuant), we detected and quantified *S. aureus* across the nares, throat, and palm of 548 community-dwelling individuals in southwestern Arizona. Using culture-based methods, we detected *S. aureus* colonization in the nares of 26.3% of individuals (n = 144); however, the combination of two detection methods across multiple body sites resulted in much higher prevalence than has been reported previously. Overall, 65.9% of participants were colonized, with significantly higher prevalence in males (compared to females) and non-Hispanics (compared to Hispanics), with this pattern especially evident in nares and throat samples. Colonizing quantities in the nares were slightly higher in males and significantly greater among non-Hispanics. The clear sex and ethnicity patterns warrant further investigation in order to identify and leverage protective factors that may drive these disparities. In the nares, *S. aureus* density was the highest, most variable, and correlates with colonization in other body sites such as throat and palm. Our results demonstrate that screening by culture-based methods only can miss individuals colonized by *S. aureus* and that previous carriage statistics are likely underestimates. By including a highly sensitive quantitative assay, this work provides a roadmap towards more comprehensive and accurate characterization of *S. aureus* carriage and the potential for more effective mitigation.

60

## AUTHOR SUMMARY (200)

61 Effective disease control and prevention is tied to pathogen identification and understanding  
62 reservoirs. *Staphylococcus aureus* infection prevention efforts and protocols are based upon  
63 decades of research on colonization patterns and associated links to subsequent infection.  
64 Unfortunately, efforts to prevent *S. aureus* infections have been met with diminishing returns,  
65 suggesting significant gaps in fundamental knowledge of colonization. However, this knowledge  
66 and resulting protocols, are founded upon culture-based detection. By employing a new  
67 quantitative PCR assay on samples from three body sites in 548 individuals, we can  
68 characterize colonization more comprehensively than previous studies by describing both  
69 prevalence and pathogen quantity. Our highly sensitive detection resulted in an overall  
70 prevalence of 65.9%. Higher quantities were associated with the nares and were highest among  
71 non-Hispanic males (86.9%). Overall prevalence was much higher than has been previously  
72 documented. Common research practices, such as culture-based detection from a single body  
73 site, may misclassify over half of colonized persons. Future studies incorporating quantitative  
74 data, especially with longitudinal sampling at more body sites will provide a more wholistic  
75 understanding of community carriage, colonization dynamics, and likelihood of autoinfection and  
76 transmission.

77

78

## INTRODUCTION

79 *Staphylococcus aureus* is a human commensal and opportunistic pathogen that causes skin  
80 and soft-tissue infection, bone and joint infection, bacterial endocarditis, and bacteremia  
81 (Williams 1963; Tong et al. 2015). Methicillin-resistant *S. aureus* (MRSA) has received particular  
82 attention due to treatment challenges surrounding antibiotic resistance and its high burden on  
83 the health-care system, though recent data suggest that invasive methicillin-susceptible *S.*  
84 *aureus* (MSSA) cases significantly outnumber MRSA cases (Centers for Disease Control and  
85 Prevention 2020; Koeck et al. 2019; Jackson et al. 2020; Crandall et al. 2020). Increased effort

86 to control life-threatening *S. aureus* infections in hospitals has resulted in a steady decline in  
87 cases over the past 15 years (Kourtis et al. 2019). However, progress in the health-care setting  
88 is out of step with increasing cases of community-onset bacteremia (Kourtis et al. 2019;  
89 Asgeirsson, Thalme, and Weiland 2017). These patterns suggest an increasingly relevant role  
90 of the community as a reservoir for *S. aureus* transmission and persistence.

91  
92 Self-infection is the most common cause of *S. aureus* infection (von Eiff et al. 2001; Wertheim et  
93 al. 2005). Carriage is thus not only a marker for prevalence in the community, but also an  
94 important risk factor for infection. Estimates of *S. aureus* carriage vary widely with geographic  
95 location, sex, age, and ethnicity. In the United States, carriage is estimated at approximately  
96 one-third of the population (Gorwitz et al. 2008; Graham, Lin, and Larson 2006; Kuehnert et al.  
97 2006; Gualandi et al. 2018; Curry et al. 2016). Carriage is higher in children than in adults,  
98 peaking between the ages of six and twelve. Throughout adulthood, carriage is mostly stable,  
99 declining slightly with age (Gorwitz et al. 2008; Graham, Lin, and Larson 2006; Erikstrup et al.  
100 2019; Holtfreter et al. 2016; den Heijer et al. 2013). Males are more likely to be colonized than  
101 females (den Heijer et al. 2013; Holtfreter et al. 2016; Erikstrup et al. 2019; Curry et al. 2016;  
102 Gorwitz et al. 2008; VandenBergh et al. 1999; Kuehnert et al. 2006; Mainous et al. 2006).  
103 Ethnicity-based trends are less clear-cut but suggest that Hispanic and non-Hispanic whites  
104 have a similar prevalence that is higher than that of non-Hispanic blacks (Mainous et al. 2006;  
105 Kuehnert et al. 2006; Gorwitz et al. 2008).

106  
107 *S. aureus* colonizes numerous body sites, the most common of which are the nares, hand,  
108 perineum, and throat (Wertheim et al. 2005). The nares are commonly reported as the most  
109 frequent site of colonization and are thought to provide a reservoir for transfer to other sites  
110 (Williams 1963; Hogan et al. 2020; J. Kluytmans, van Belkum, and Verbrugh 1997; Rohr et al.  
111 2004). Indeed, decolonization of the nares has been shown to decrease colonization at other

112 body sites (Reagan et al. 1991). Nasal carriage is also an important risk factor for infection  
113 during surgery (J. A. J. W. Kluytmans et al. 1995; Kalmeijer et al. 2000). Although the  
114 importance of nasal carriage is well-documented, an increasing number of studies have  
115 examined throat and nasal carriage in parallel and report similar (Young et al. 2017) or greater  
116 prevalence in the throat (Erikstrup et al. 2019; Sollid et al. 2014; Nilsson and Ripa 2006;  
117 Hamdan-Partida, Sainz-Espuñes, and Bustos-Martínez 2010), suggesting that the throat may  
118 play an under-appreciated role as a body site reservoir.

119  
120 Given that the quantity of *S. aureus* among colonized persons has implications for autoinfection  
121 and transmission, current binary *S. aureus* carriage characterization likely provide an  
122 incomplete representation of *S. aureus* burden. However, quantitative aspects of carriage at a  
123 given body site have not been widely studied. For example, the quantity of *S. aureus* in the  
124 nares is positively associated with postsurgical infection risk (Calia et al. 1969; J. A. J. W.  
125 Kluytmans et al. 1995; White 1961a), with higher likelihood of transmission to household  
126 members (Ehrenkranz 1964), and with greater dissemination of *S. aureus* into the environment  
127 (White 1961b). It has also been observed that, relative to males, nasal carriage in women is  
128 characterized by smaller *S. aureus* quantities and a higher likelihood of a false-negative  
129 carriage classification using conventional culturing methods. Thus, bacterial quantity is an  
130 important yet understudied feature of colonization, and combining independent quantitative and  
131 culture-based assessments of *S. aureus* should improve the validity of investigations of possible  
132 sex-based disparities in nasal carriage and putative sex-based determinants of *S. aureus*  
133 transmission (Liu et al. 2015). Although most quantitative studies for *S. aureus* have been  
134 culture-based, this approach does not lend itself well to quantification due to resource intensity  
135 and limited throughput.

136

137 To better understand binary and quantitative community-based carriage, we apply a quantitative  
138 PCR assay to samples collected from a large cohort of community members in Yuma, Arizona  
139 (Barger et al. 2020; Pearson et al. 2019; 2021). Based on data collected during the validation of  
140 a new highly sensitive and specific qPCR assay for the accurate detection and quantification of  
141 *S. aureus* (Wood et al. 2021), we expected to achieve higher detection sensitivity compared to  
142 culture-based detection. We further hypothesized, in line with existing literature, that the nares  
143 would be the most frequently colonized body site, with the highest colonization loads; that  
144 prevalence and quantity would be greater in males compared to females; that prevalence and  
145 quantity between Hispanics and non-Hispanics would be similar; and finally, that prevalence  
146 and quantity would decrease slightly with age.

147

## 148 **METHODS**

### 149 **Study Overview**

150 This study is part of a larger investigation aimed at understanding carriage and transmission  
151 within social groups in a population on the US/Mexico border (Pearson et al. 2021; Barger et al.  
152 2020; Pearson et al. 2019). Study staff recruited participants in naturally occurring social groups  
153 of two or more persons and supervised the self-collection of swabs from three body sites: the  
154 nares, throat, and palm. Participants additionally filled out a questionnaire which, among other  
155 variables, documented their demographic information. Any person older than six months was  
156 eligible to participate and received a gift card as an incentive. Adult participants provided  
157 informed consent and children provided assent. Responses for younger children were  
158 completed by an adult proxy.

159

160 Participants were recruited in naturally occurring groups of 2 or more persons and included  
161 individuals ranging from infancy to adults as old as 93 years. Data were collected from 565

162 participants from March of 2019 through March of 2020. For the analyses within this manuscript,  
163 17 participants were excluded for incomplete data on sex, age, ethnicity, or assay, leaving a  
164 complete sample of 548 participants. From these participants, 608 of the samples from the three  
165 body sites were positive for *S. aureus* using culture and molecular-based assessments.

166

### 167 **Sample collection**

168 Two double-tipped BBLCultureSwab swabs were used to sample each of the three body sites  
169 (each body site was therefore sampled twice). Study staff demonstrated and explained the  
170 swabbing protocol to each participant before providing them with swabs and assisted  
171 participants when necessary. Study staff performed the swabbing for young children or elderly  
172 participants who could not or chose not to self-collect. When sampling the nares, participants  
173 were instructed to insert the double tip swab into the anterior nares and rotate it as they moved  
174 it around, sampling each nostril for ten seconds with the same swab. When sampling the throat,  
175 participants were instructed to swab the back of their tongue, mouth, and cheeks for twenty  
176 seconds while rotating the swab. When sampling the palm, participants were instructed to rub  
177 the swab over the palm of their hand and between their fingers for twenty seconds. During  
178 sampling, study staff counted aloud and reminded participants to rotate the swab and cover the  
179 entire body site during the sampling of each body site to maintain sample collection consistency  
180 across individuals.

181

### 182 **Sample storage, transportation, and culturing**

183 After collection, all swabs were stored and transported on ice to the laboratory. In the laboratory,  
184 one of the two swabs from each body site was used for culturing. The selected swab was stored  
185 for no longer than 24 hours at 4°C before culturing to maximize the likelihood of cell survival  
186 (Panisello Yagüe et al. 2021). Each such swab was streaked onto CHROMagar *S. aureus*



187 media and incubated for 24 hours at 37°C. Plates were read after incubation to assess for *S.*  
188 *aureus* growth. Colonies that appeared in the pink to mauve color range were considered to be  
189 *S. aureus*. One colony from each swab was isolated and sequenced for species verification and  
190 all suspected *S. aureus* colonies were stored at -70°C in 20% glycerol. The second swab from  
191 each body site, which did not undergo culturing, was stored at -70°C until direct DNA  
192 extraction.

193

#### 194 **DNA extraction**

195 DNA was isolated from suspected positive *S. aureus* colonies using the Qiagen DNEasy Blood  
196 and Tissue kit with modified lysis for gram positive bacteria. Each sample was streaked for  
197 isolation and a lawn from a single colony was grown for extraction. The remaining swab  
198 samples (one from each body site) that were not used for culturing were extracted on a  
199 Thermofisher KingFisher Flex instrument using an Applied Biosystems MagMAX™ DNA Multi-  
200 Sample Ultra 2.0 Kit with a final elution volume of 50µL.

201

#### 202 **qPCR assay**

203 The SaQuant qPCR assay was run on 1µL aliquots of DNA extract, using an Applied  
204 Biosystems QuantStudio 7 and 12 real-time PCR machines following the published protocol  
205 (Wood et al. 2021). Standard curves for quantification were constructed using a minimum of five  
206 10-fold serial dilutions, and at least one standard curve was included in each qPCR run. A  
207 quantification value for each sample was generated from its associated standard curve(s) using  
208 the QuantStudio software. Data are presented as genome equivalents per reaction.

209

#### 210 **Data analyses**

211 Statistical analyses and data visualization was carried out using R version 1.3.1093 (R Core  
212 Team 2018). Violin plots, pie charts, and Venn diagrams were generated using the data  
213 visualization package ggplot2 version 3.3.3 (Wickham 2016). Mann-Whitney tests were  
214 conducted to determine significant differences between *S. aureus* quantities across  
215 dichotomous independent variables (culture detection, sex, ethnicity). Because of correlated  
216 data, the Friedman test was used to detect differences in quantity between the three body sites  
217 (nares, throat, and palm), with post-hoc Nemenyi pairwise comparisons. Two-proportion z-tests  
218 were used to determine statistically significant differences between prevalence among sexes  
219 (males and females) and ethnicities (Non-Hispanic and Hispanic). Chi-squared tests were  
220 utilized to determine statistically significant differences in prevalence across age classes, while  
221 the Kruskal-Wallis rank sum test with post-hoc Mann-Whitney tests, if warranted, were used to  
222 compare quantities across age classes. Linear regression models were generated to determine  
223 potential associations between colonization and *S. aureus* quantities at one body site with  
224 another. Tests yielding a two-tailed p-value  $\leq 0.05$  were considered statistically significant.

225

226

## RESULTS

### 227 Study participants

228 The 548 participants had an average age of 32.1 years. There were 96 participants under the  
229 age of 18. Most participants (50.5%) were married, a slight majority (54.9%) were female, and  
230 most (72.8%) reported Hispanic ethnicity. Sociodemographic characteristics of participants are  
231 included in Table 1.

232 **Table 1. Sample Baseline Characteristics**

| Characteristic  | Total | <i>S. aureus</i><br>negative | <i>S. aureus</i><br>positive |
|-----------------|-------|------------------------------|------------------------------|
| Participants, n | 548   | 187                          | 361                          |

|                           |      |        |      |        |      |        |
|---------------------------|------|--------|------|--------|------|--------|
| Age y, mean (SD)          | 32.1 | (16.8) | 34.1 | (18.1) | 31.0 | (16.0) |
| Sex, % (n)                |      |        |      |        |      |        |
| Female                    | 54.9 | (301)  | 42.5 | (128)  | 57.5 | (173)  |
| Male                      | 45.1 | (247)  | 23.9 | (59)   | 76.1 | (188)  |
| Ethnicity, % (n)          |      |        |      |        |      |        |
| Non-Hispanic              | 27.2 | (149)  | 24.2 | (36)   | 75.8 | (113)  |
| Hispanic                  | 72.8 | (399)  | 37.8 | (151)  | 62.2 | (248)  |
| Race, % (n)               |      |        |      |        |      |        |
| White                     | 65.3 | (358)  | 31.8 | (114)  | 68.2 | (244)  |
| Black/African American    | 1.1  | (6)    | 33.3 | (2)    | 66.7 | (4)    |
| Native American           | 0.7  | (4)    | 50.0 | (2)    | 50.0 | (2)    |
| Asian                     | 2.0  | (11)   | 36.4 | (4)    | 63.6 | (7)    |
| Hawaiian/Pacific Islander | 0.5  | (3)    | 33.3 | (1)    | 66.7 | (2)    |
| Other race                | 4.0  | (22)   | 54.5 | (12)   | 45.5 | (10)   |
| Multi Race                | 4.4  | (24)   | 25.0 | (6)    | 75.0 | (18)   |
| No preferred race         | 9.9  | (54)   | 35.2 | (19)   | 64.8 | (35)   |
| Missing                   | 12.0 | (66)   | 40.9 | (27)   | 59.1 | (39)   |
| Marital status, % (n)     |      |        |      |        |      |        |
| Divorced                  | 4.4  | (24)   | 41.7 | (10)   | 58.3 | (14)   |
| Married                   | 50.5 | (277)  | 29.2 | (81)   | 70.8 | (196)  |
| Never married             | 34.1 | (187)  | 34.8 | (65)   | 65.2 | (122)  |
| Separated                 | 5.7  | (31)   | 58.1 | (18)   | 41.9 | (13)   |
| Widowed                   | 1.1  | (6)    | 83.3 | (5)    | 16.7 | (1)    |
| Missing                   | 4.2  | (23)   | 34.8 | (8)    | 65.2 | (15)   |
| Education level, % (n)    |      |        |      |        |      |        |

|                            |      |       |      |      |      |       |
|----------------------------|------|-------|------|------|------|-------|
| < High school              | 25.0 | (137) | 39.4 | (54) | 60.6 | (83)  |
| High school diploma        | 12.2 | (67)  | 41.8 | (28) | 58.2 | (39)  |
| Some college               | 41.6 | (228) | 26.8 | (61) | 73.2 | (167) |
| College graduate or higher | 19.5 | (107) | 36.4 | (39) | 63.6 | (68)  |
| Missing                    | 1.6  | (9)   | 55.6 | (5)  | 44.4 | (4)   |

---

233

234 **Comparison of *S. aureus* detection methods:**

235 For each body site, we compared culture and qPCR for detection of *S. aureus*. Culturing was  
236 not specific for detecting *S. aureus*, resulting in false positives that were excluded from this  
237 sample set after whole genome sequence comparisons. Culturing was also not as sensitive as  
238 SaQuant, resulting in 297 out of 608 positive samples (48.8%) detected via culture compared to  
239 553/608 (91.0%) detected by SaQuant (Fig 1A). The SaQuant assay is new with impressive  
240 sensitivity and specificity values calculated by running the assay against 533 *S. aureus* isolates  
241 and 10 non-*aureus Staphylococcus* isolates as well as *in-silico* against 1,818 *S. aureus*  
242 genomes and 1,834 non-*aureus Staphylococcus* genomes (Wood et al. 2021). However, as this  
243 assay had not been assessed outside the initial validation study (Wood et al.), we further  
244 evaluated the sensitivity and specificity of the assay with these data.

245  
246 Across the three body sites, there were 55 culture positive but PCR negative samples. As only a  
247 single replicate of each sample was tested against SaQuant, we expected samples with low *S.*  
248 *aureus* quantities to be stochastically detected, leading to a small proportion of false negatives.  
249 As we had culture and whole genome sequences from the paired swab for these 55 samples,  
250 we were able to confirm a 100% sequence match with the primer and probe target sites to show  
251 that genomic mutations are not responsible for the lack of amplification. Low quantities of *S.*  
252 *aureus* on a sample swab are also likely to account for the 311 samples that were culture  
253 negative, but detectable via qPCR as they had a significantly lower quantity of *S. aureus* (Fig  
254 1B).

255  
256 For assurance that SaQuant was not producing false positive results, we performed amplicon  
257 sequencing on samples with the highest amounts of *S. aureus* DNA as detected by the  
258 SaQuant assay. We targeted 23 *S. aureus* specific amplicons that did not amplify in other  
259 *Staphylococcus* species (using *in silico* PCR). The targets were successfully amplified in each

260 of the samples and BLASTn (Zhang et al. 2000) searches of the sequences resulted in only hits  
261 to *S. aureus*.

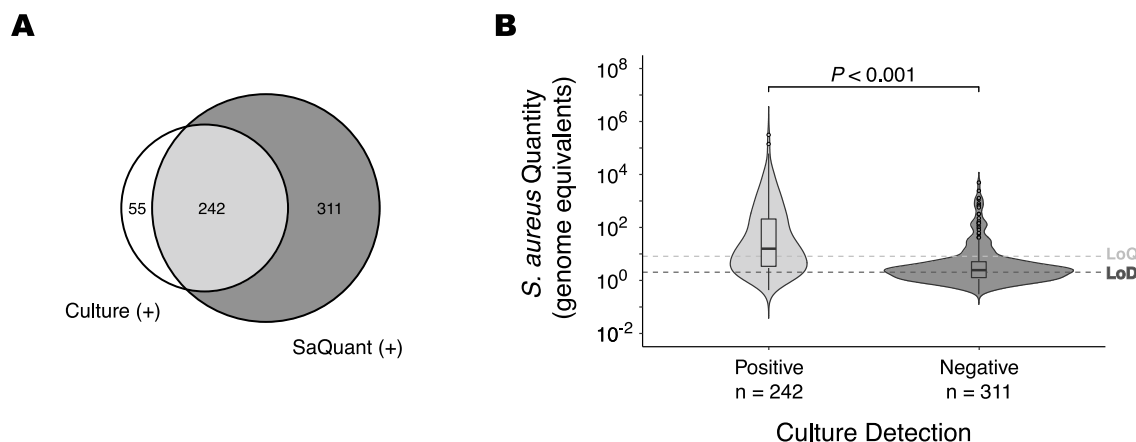

262

263 **Fig 1. Comparison of culture and SaQuant for *S. aureus* detection.** A) Proportion of

264 samples (n=608) that were positive with only culture, both culture and SaQuant qPCR, and only

265 SaQuant qPCR. A large proportion of samples were exclusively detected by SaQuant while only

266 a few were exclusively picked up by culture. B) Distribution of *S. aureus* quantity in 553 samples

267 positive for the SaQuant assay shows higher quantities in samples that were culture positive

268 compared to culture negative samples. Detection and quantitative comparisons suggest that the

269 SaQuant qPCR assay is more reliable for *S. aureus* detection due to a higher likelihood of

270 detecting low quantities. Differences in *S. aureus* quantities between culture positive and

271 negative samples were statistically significant according to the Mann-Whitney test ( $P < 0.001$ ).

272 *S. aureus* amounts below the limit of detection (LOD) of between 3 and 5 genomic copies can

273 still be detected, albeit at less than a 95% confidence level. Likewise, amounts below the limit of

274 quantification (LOQ) of 8.27 genomic equivalents will be quantified with less accuracy.

275

276 ***S. aureus* at different body sites:**

277 Culture and qPCR detection were used to determine *S. aureus* presence at each sample site  
278 (Fig 2A). The SaQuant assay revealed a higher *S. aureus* prevalence than culture, suggesting  
279 higher sensitivity. However, culture was able to detect *S. aureus* in some samples that were  
280 negative for SaQuant, as well as a subset of samples that did not undergo qPCR testing due to  
281 insufficient DNA reserves. Therefore, combining both methods provided the highest level of  
282 detection. Overall detection of *S. aureus* was similar at the nares and throat body sites, with  
283 respective presence in 233 and 234 of 548 (42.5 and 42.7%) participants compared to only  
284 151/548 (27.6%) for palm samples. Body site results from Fig 2A were used to determine  
285 prevalence on a participant basis (Fig 2B). Individuals positive at any site were considered  
286 positive for *S. aureus*. The SaQuant assay was more sensitive than culture at all body sites and  
287 combining both methods across three body sites resulted in *S. aureus* prevalence of 65.9%  
288 (361/548) of participants. Overall prevalence represents a broad overview of *S. aureus*  
289 colonization but does not account for the prospect of colonization at multiple sites. Hence,  
290 prevalence results were dissected to indicate the proportion of individuals colonized exclusively  
291 at one body site, two sites, and all three sites (Fig 2c). Consistent with Fig 2A and 2b, a  
292 combination of detection methods yielded the highest prevalence of *S. aureus* colonization.  
293 Individuals colonized exclusively at a single body site accounted for 49.9% of positive  
294 participants (180/361), while 29.1% of positive participants were colonized at two body sites  
295 (105/361) and 21.1% (76/361) were colonized at all three sites. A major benefit of a qPCR  
296 assay is the ability to quantify the target of interest present in a sample. In this study, we utilized  
297 the SaQuant assay to quantify the *S. aureus* load for sample swabs collected from the nares,  
298 throat, and palm (Fig 3). *S. aureus* quantity was significantly different across all three body sites  
299 (Friedman test,  $P < 0.001$ ). Nares samples exhibited higher quantities compared to both throat  
300 ( $P < 0.001$ ) and palm samples ( $P < 0.001$ ), while throat samples had higher quantities  
301 compared to palm samples ( $P < 0.001$ ).  
302

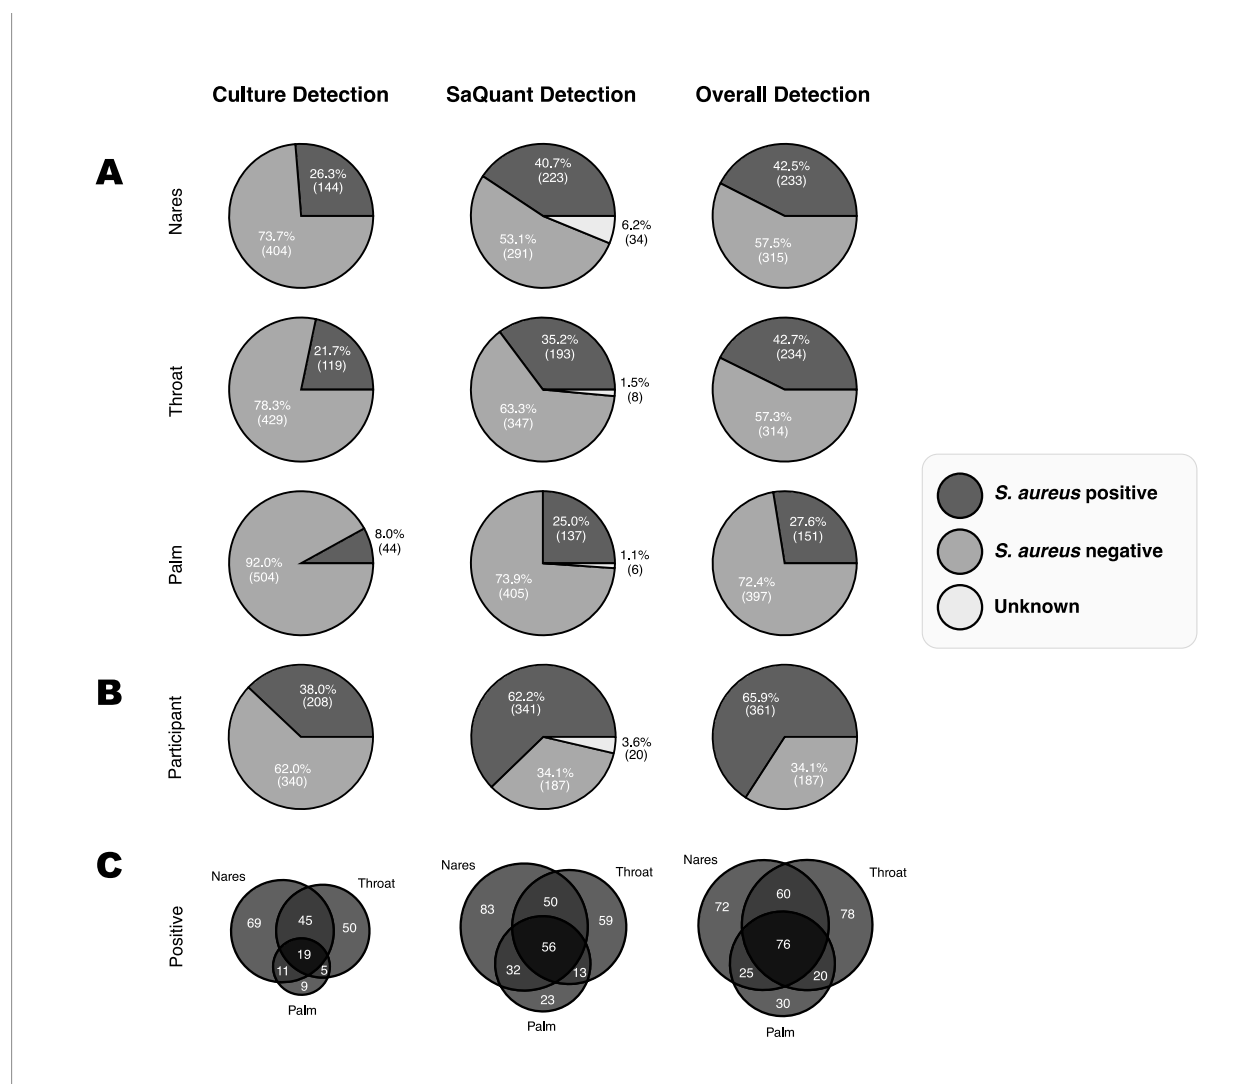

303  
 304 **Fig 2. Prevalence across sites for 548 participants.** A) Consistent with Fig 1, SaQuant shows  
 305 greater sensitivity in detecting *S. aureus* at each body site. Combining culture and SaQuant  
 306 results provides the highest detection sensitivity. A subset of samples could not be evaluated  
 307 with SaQuant, as DNA extraction failed. B) When data are combined across all 3 body sites,  
 308 detection with SaQuant is greater than for culture, but combining SaQuant with culture provides  
 309 the greatest overall detection. For culture, combining data across 3 sites results in a prevalence  
 310 estimation that is slightly greater than most published population accounts. When detection  
 311 methods and body sites are combined, the overall prevalence is 65.9%. C) The number of



312 individuals with carriage at single or multiple body sites. Individual samples that did not have a  
313 pair at the other body sites were excluded.

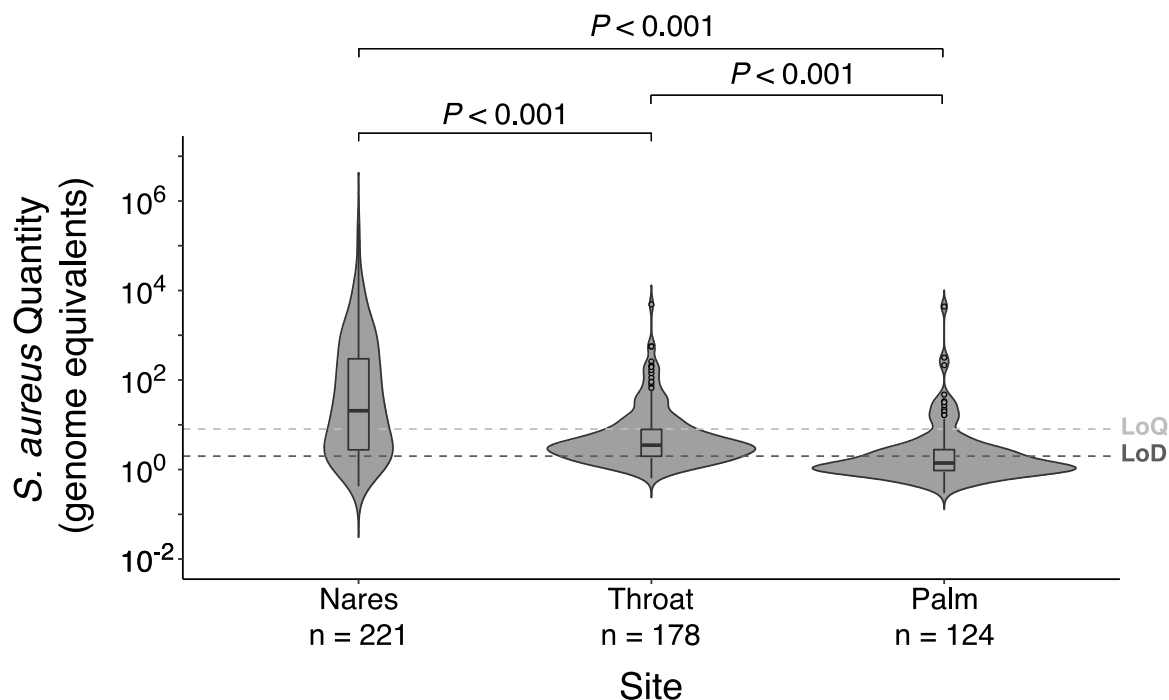

314  
315 **Fig 3. Quantities at different body sites.** Quantities differ at each body site (Friedman test,  $P$   
316 < 0.001). Specifically, the quantity in nares is greater than the throat and palm (Nemenyi test,  $P$   
317 < 0.001) and throat quantities are greater compared to the palm (Nemenyi test,  $P$  < 0.001).

318  
319 ***S. aureus* colonization and sex, ethnicity, and age:**

320 We evaluated sex and ethnicity-based disparities in colonization and quantity. Sex-based  
321 disparities were of particular interest given differences in male and female bacterial colonization.  
322 As previously discussed, *S. aureus* prevalence was highest when qPCR and culture results  
323 were combined. Taking this combined approach, males showed significantly higher *S. aureus*  
324 prevalence compared to females at all individual body sites, as well as overall colonization  
325 prevalence (i.e., any positive *S. aureus* result; Fig 4A). Differences in *S. aureus* quantity

326 between males and females at the nares ( $P = 0.094$ ), throat ( $P = 0.695$ ), and palm ( $P = 0.152$ )  
327 were not statistically significant (Fig 4B). The apparent discrepancy with overall site-based  
328 prevalence is likely due to the small sample size for quantitative analysis, as some samples  
329 were exclusively detected by culture and therefore have no associated quantity value.

330  
331 *S. aureus* colonization across ethnicity was another area of interest considering findings  
332 suggesting a greater prevalence among non-Hispanic individuals (Kuehnert et al. 2006; Gorwitz  
333 et al. 2008). Our data revealed that *S. aureus* colonization was more prevalent for non-Hispanic  
334 participants compared to Hispanic participants at all body sites, although the difference was only  
335 statistically significant at the nares, throat, and participant level (Fig 5A). qPCR results showed  
336 significantly higher quantities for non-Hispanic individuals compared to Hispanic individuals at  
337 the nares ( $P = 0.028$ ); However, differences at the palm and throat were not statistically  
338 significant (Fig 5B). Lastly, differences in *S. aureus* quantity and prevalence across participant  
339 age were also examined. Participants were split into three age classes (0-19, 20-49, and  $\geq 50$ )  
340 to compare prevalence and quantity. *S. aureus* prevalence between age classes yielded no  
341 significant difference at any site, although the data generally shows higher prevalence among  
342 participants aged 20-49, and lower prevalence among participants aged 50 or greater (Fig 6A).  
343 Similarly, comparison of *S. aureus* quantity between age classes resulted in no significant  
344 difference at any body site (Fig 6B).

345

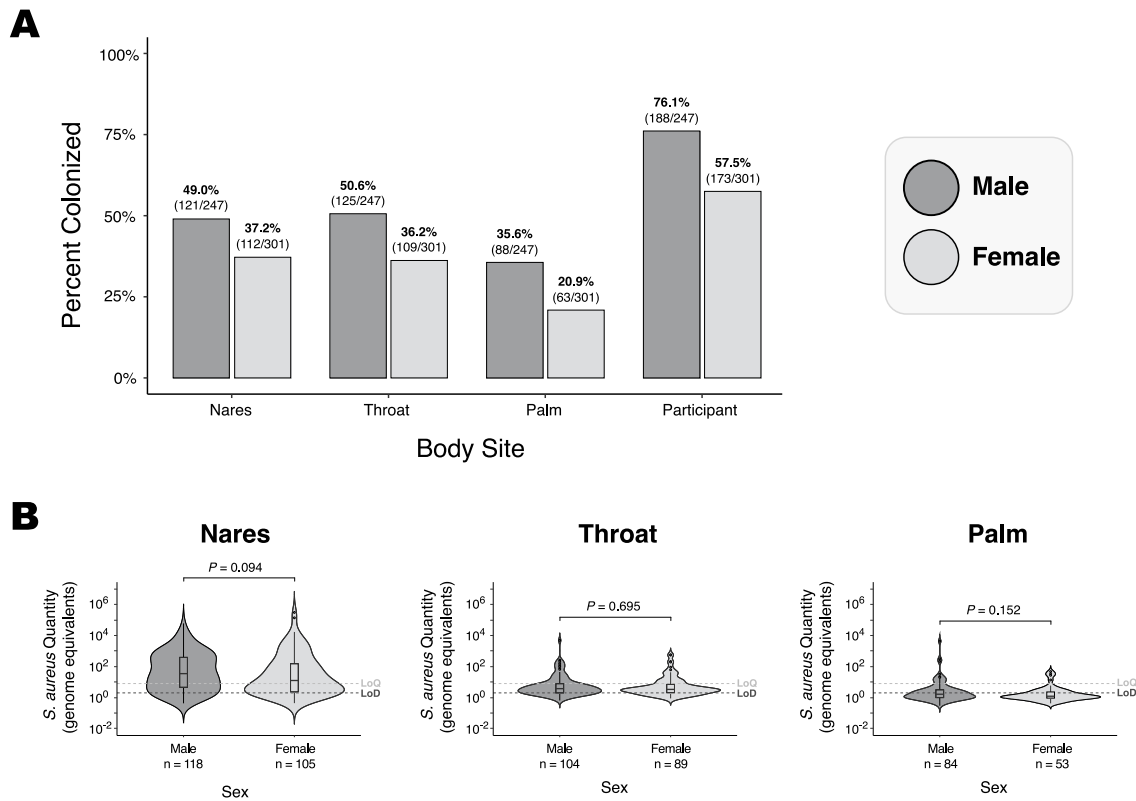

346

347

348 **Fig 4. Colonization across sex and body site.** A) Prevalence at different body sites for males

349 and females shows a higher prevalence of *S. aureus* in males compared to females at all

350 individual sites as well as on a participant level. Differences in prevalence between males and

351 females were statistically significant according to the two-proportion z-tests (Nares:  $Z = 2.78$ ,  $P$

352 = 0.006, Throat:  $Z = 3.39$ ,  $P < 0.001$ , Palm:  $Z = 3.83$ ,  $P < 0.001$ , Participant:  $Z = 4.58$ ,  $P <$

353 0.001). B) Differences in quantity between males and females were not statistically significant

354 using the Mann-Whitney test. Quantity plots were made with a subset of the data used for the

355 presence bar plots, as there are samples that were exclusively detected by culture, and hence

356 have no associated quantity value.

357

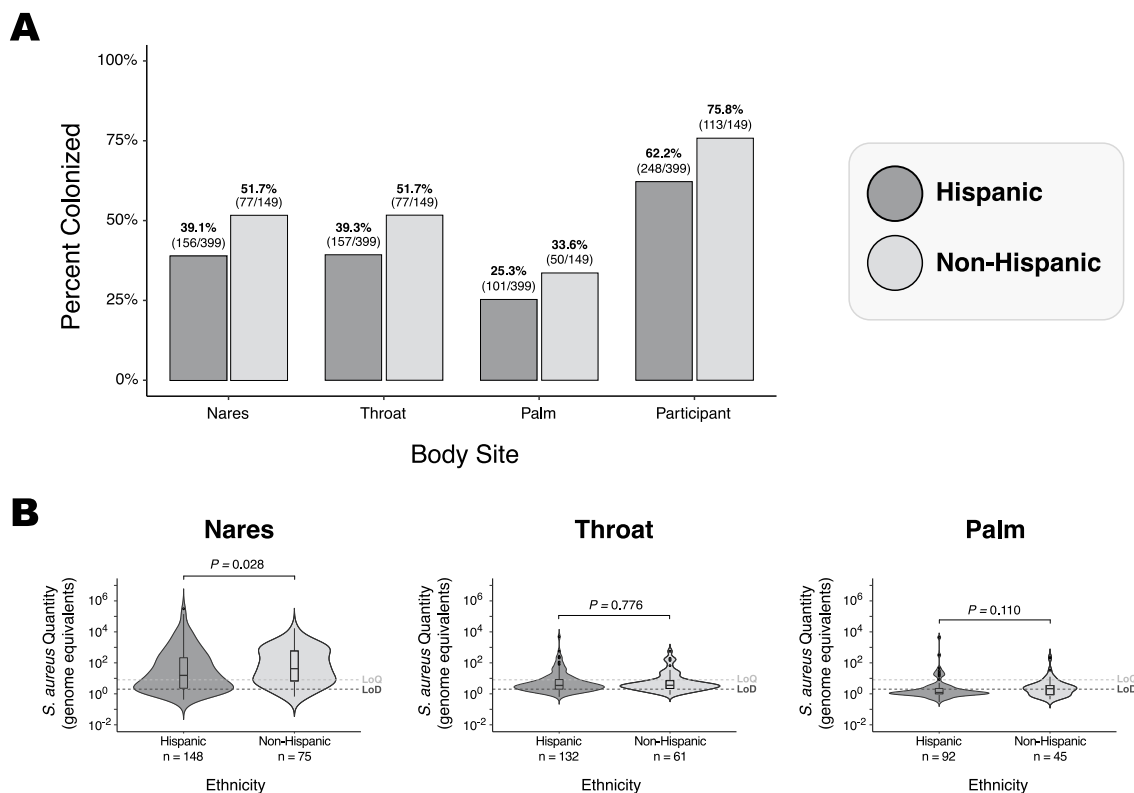

358  
 359 **Fig 5. Colonization across ethnicity and body site.** A) Non-Hispanic individuals had higher  
 360 prevalence of *S. aureus* colonization compared to Hispanic individuals at the nares, throat, and  
 361 participant level according to the two-proportion z-tests (Nares:  $Z = 2.65$ ,  $P = 0.008$ , Throat:  $Z$   
 362  $= 2.60$ ,  $P = 0.009$ , Palm:  $Z = 1.92$ ,  $P = 0.055$ , Participant:  $Z = 3.01$ ,  $P = 0.003$ ) (two-  
 363 proportion z-test). Colonization was also higher in the palm for non-Hispanic individuals, but this  
 364 difference was not statistically significant. B) *S. aureus* quantity was significantly higher for non-  
 365 Hispanic individuals at the Nares body site.

366  
 367  
 368  
 369  
 370

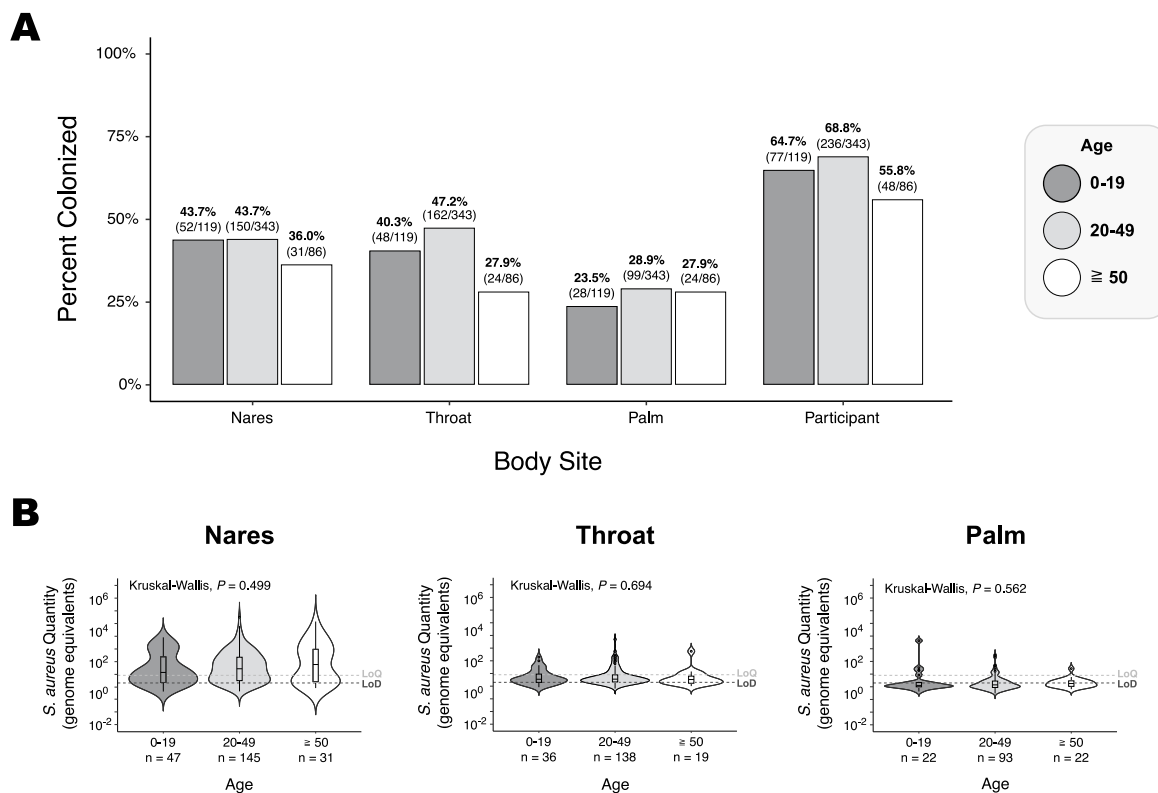

371

372 **Fig 6. Prevalence and quantities at different body sites across three age classes. A)**

373 Prevalence patterns across different age groups suggests a lower prevalence in the oldest age

374 group and a higher prevalence in the middle age group, but these differences are only

375 significant at the throat and participant level between age groups 20-49 and  $\geq 50$  (Throat:  $X^2 =$

376 9.68,  $P = 0.002$ , Participant:  $X^2 = 4.62$ ,  $P = 0.032$ ). All other comparisons between age groups

377 0-19 and 20-49 (Nares:  $X^2 = 0$ ,  $P = 1$ , Throat:  $X^2 = 1.43$ ,  $P = 0.232$ , Palm:  $X^2 = 1.01$ ,  $P = 0.316$ ,

378 Participant:  $X^2 = 0.50$ ,  $P = 0.478$ ), 20-49 and  $\geq 50$  (Nares:  $X^2 = 1.36$ ,  $P = 0.243$ , Palm:  $X^2 = 0$ ,  $P$

379  $= 0.967$ ), as well as 0-19 and  $\geq 50$  (Nares:  $X^2 = 0.92$ ,  $P = 0.339$ , Throat:  $X^2 = 2.86$ ,  $P = 0.091$ ,

380 Palm:  $X^2 = 0.30$ ,  $P = 0.584$ , Participant:  $X^2 = 1.31$ ,  $P = 0.253$ ), were not significantly different. B)

381 Quantity of *S. aureus* at each body site does not differ according to age group.

382

383 **Cross-Site Influences:**

384 Sampling at multiple sites enabled us to conduct cross-site comparisons using data obtained  
 385 from the SaQuant assay. Fig 7A shows the association between colonization at a given site and  
 386 the presence and bacterial quantity of colonization at other sites. These comparisons reveal that  
 387 a high *S. aureus* quantity in the nares is associated with concurrent colonization at other sites.  
 388 Conversely, throat and palm quantity comparisons yielded no association with the number of  
 389 sites colonized. Body site data also allowed us to study potential quantity associations between  
 390 sites (Fig 7B). Comparisons showed no significant association between bacterial quantity for  
 391 any pairwise comparison of body sites.  
 392

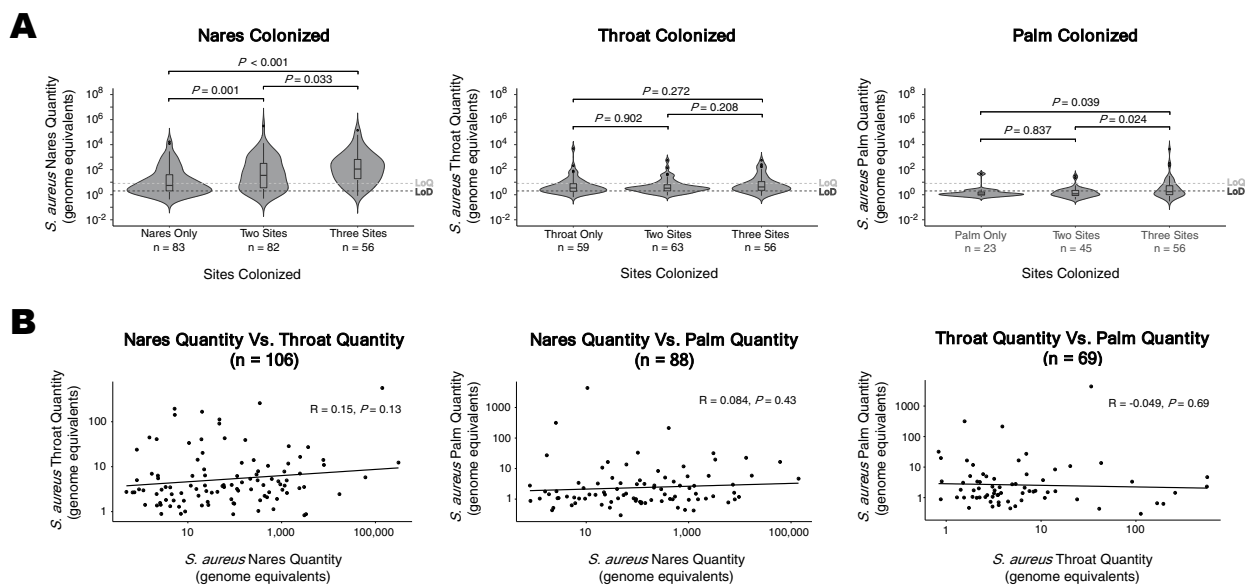

393  
 394 **Fig 7. Association of colonization and bacterial quantity at one body site with**  
 395 **colonization and bacterial quantity at other body sites. A) Quantity at each body site when**  
 396 **different sites are also colonized. Quantity in nares was significantly higher when other sites**  
 397 **were also colonized, however, B) quantities are not associated among sites.**

398

399

## DISCUSSION

400 We combined culture and quantitative PCR-based methods on samples from three different  
401 body sites to characterize *S. aureus* colonization in a cohort of 548 participants in southwestern  
402 Arizona. Sampling from multiple body sites and combining culture with qPCR detection methods  
403 resulted in much higher sensitivity than sampling from any single site or culture alone. For  
404 example, combining all culture results (from the nares, throat, and palm) yielded a prevalence of  
405 38% compared to 26.3% from nares cultures alone. Similarly combining culture and qPCR  
406 detection from nares samples yielded a prevalence of 42.5% compared to 26.3% and 40.7% for  
407 nares culture and nares qPCR prevalence (respectively) alone.

408  
409 Overall, >65% of participants were colonized with *S. aureus*. Males and non-Hispanics were  
410 more likely to be colonized than females and Hispanics. Our current understanding of *S. aureus*  
411 carriage in the US population is largely based on data obtained in the 2001-2002 National  
412 Health and Nutrition Examination Survey (NHANES) which found an overall prevalence of  
413 ~32%, with higher prevalence among males, but no clear difference between Hispanics and  
414 non-Hispanics (Kuehnert et al. 2006; Mainous et al. 2006; Gorwitz et al. 2008; Graham, Lin, and  
415 Larson 2006). Our data show a much higher overall prevalence and clear sex and ethnic-based  
416 differences. Slightly lower nasal prevalence, varying from 12.1% to 29.4%, were documented  
417 across 9 European countries, with higher prevalence in males and in younger age groups (den  
418 Heijer et al. 2013). However, both the US and European estimates, as well as those in other  
419 studies, were derived from culture-based detection from a single site, the anterior nares. In the  
420 present data, when also restricting positive results to culture-based detection from anterior  
421 nares swabs, overall prevalence (26.3%) is in line with previous estimates, suggesting that  
422 these previous studies are likely to have lacked sensitivity and underestimated prevalence.

423  
424 Comparing prevalence across multiple body sites can improve insights into reservoirs and  
425 sources for spread to other body sites and other people. The anterior nares are most

426 consistently identified as a site of colonization, providing evidence for the epidemiological  
427 importance of this body site. However, studies that consider both anterior nares and throat  
428 colonization show similar or even higher prevalence in the throat, suggesting that the throat  
429 should not be overlooked as a principal reservoir or dispersion site (Young et al. 2017; Erikstrup  
430 et al. 2019; Sollid et al. 2014; Hamdan-Partida, Sainz-Espuñes, and Bustos-Martínez 2010;  
431 Nilsson and Ripa 2006). Consistent with these studies, our data show that *S. aureus* was most  
432 prevalent in the nares (42.5%) and the throat (42.7%). Furthermore, 21.6% of individuals  
433 positive for *S. aureus* were colonized exclusively in the throat, which is slightly higher than the  
434 19.9% colonized exclusively in the nares. *S. aureus* on the palm was least prevalent (27.6%),  
435 however 30 individuals (8.3%) were colonized exclusively on the palm, suggesting that the role  
436 of other body sites in maintenance and spread may be minor, but should not be ignored.

437  
438 *S. aureus* quantity at any given site has direct implications on the likelihood of spread and  
439 transmission, and the likelihood of autoinfection (White 1961b; Ehrenkranz 1964), however we  
440 know almost nothing about quantitative aspects of community carriage. With one exception (Liu  
441 et al. 2015), the few studies that quantified *S. aureus* colonization relied on culture-based  
442 enumeration, but the expense and time-consuming nature of these methods have severely  
443 limited such studies. To address this deficit, we utilized SaQuant, a recently developed assay  
444 for the detection and quantification of *S. aureus* (Wood et al. 2021). A small number of other  
445 PCR assays are available for *S. aureus*; however, they were 1) not validated for quantification,  
446 2) used limited *in silico* data (compared to what is available today), 3) utilized proprietary DNA  
447 signatures that cannot be readily assessed, 4) include assay metrics that were not peer  
448 reviewed, or 5) have lower sensitivity/specificity (Wood et al. 2021). By employing this  
449 quantitative assay alongside culture-based detection, we not only show that culture is less  
450 sensitive than SaQuant, but also that this failure to detect positive samples was mostly due to  
451 low quantities of *S. aureus*. Our use of SaQuant for quantitative assessment of *S. aureus*



452 colonization reveals some interesting characteristics of carriage in the anterior nares compared  
453 to the throat and palm. For example, quantity in the anterior nares is highly variable, with values  
454 ranging from less than a single genome equivalent per 1 $\mu$ L to over 310,386. The average  
455 quantity in the nares was significantly greater than the throat, which in turn, was greater than the  
456 palm. Unlike the other body sites, the average quantities in the nares were greater in males  
457 (compared to females) and non-Hispanics (compared to Hispanics), although the sex-based  
458 difference was not statistically significant. Quantities in the nares were also greater when other  
459 sites were colonized, however quantities in those other sites were not correlated with nares  
460 quantity. These characteristics of nares colonization (the potentially massive quantities that may  
461 be found in the nares, the correlation of quantities in the nares with sex, ethnicity, and  
462 colonization at other body sites) were not observed for the throat and suggest that the  
463 epidemiological role of nares colonization may be significantly distinct from other sites.

464  
465 Our work has some important limitations. Firstly, culture-based detection methods for *S. aureus*  
466 are varied and our detection sensitivity may have been improved by broth enrichment for  
467 example . Similarly, sensitivity for qPCR-based detection would have been increased by testing  
468 replicates to reduce the stochasticity associated with detecting low target quantities. As a result,  
469 our prevalence values for both culture and qPCR are undoubtedly underestimated. Secondly,  
470 our sampling was cross-sectional, and thus does not provide any insights into carriage over time  
471 or temporal relationships between carriage across sites. Lastly, unlike other studies (Gorwitz et  
472 al. 2008; Graham, Lin, and Larson 2006; Erikstrup et al. 2019; Holtfreter et al. 2016), we did not  
473 observe any statistically significant age-based differences in colonization, however this may be  
474 due to small sample sizes in different age groups or underestimation of detection in these other  
475 studies.

476

477 **Conclusions**

478 Effective disease control and prevention is dependent on identifying and understanding

479 pathogen reservoirs. A major contribution of our work is that previous efforts are likely to have

480 lacked sensitivity for detection of *S. aureus* and therefore underestimated carriage. There exists

481 a large body of literature describing prevalence of *S. aureus*, but it is difficult to compare results

482 across studies due to different collection, storage, and culture methodologies, different sampling

483 timelines, and different subject demographics. Our study allows for some comparisons to

484 previous work as we sampled from commonly targeted body sites and used a culture-based

485 detection method in addition to molecular detection. While our culture-based prevalence results

486 are consistent with expectations based on previous studies, our qPCR detection results are

487 much higher than has been documented in a general population (J. Kluytmans, van Belkum,

488 and Verbrugh 1997; den Heijer et al. 2013). It is certainly possible that our population is

489 anomalous for some unknown reason, however our data provide evidence that our high overall

490 prevalence estimates are explained by higher detection sensitivity (assessing 3 body sites and

491 utilizing direct culture in combination with qPCR). The failure of culture-based methods to

492 capture a substantial portion of carriers has been previously suggested (Liu et al. 2015) and the

493 gains in sensitivity by using PCR and sampling multiple body sites for the detection of MRSA

494 has been demonstrated (Senn et al. 2012). Taken together, previous prevalence studies that

495 sampled a single body site or relied on culture-based detection may have significantly

496 underestimated carriage. These studies however form the foundation of our current

497 understanding of community carriage, longitudinal carriage within individuals, carriage at

498 different body sites, assessments of infection risk, and infection mitigation practices. Pervasive

499 underestimation of carriage and insufficient practices for identifying carriage may, at least

500 partially, explain why infection control progress seems to have stalled.

501

502 Few studies have investigated the epidemiological importance of carriage quantity and this work  
503 helps fill this knowledge gap using a new high-throughput quantitative tool. These studies  
504 suggest that a high quantity of *S. aureus* is more likely to be found in the nares compared to the  
505 axillae and groin (Rohr et al. 2004), in persistent carriers (White 1961a), and males (Liu et al.  
506 2015), leads to higher environmental contamination (White 1961b), colonization at other body  
507 sites (Mermel et al. 2011), transmission to others (Ehrenkranz 1964) and ultimately, a higher  
508 risk of infection (Calia et al. 1969; White 1963). We are aware of only a single study of carriage  
509 quantity in a non-clinical population (Liu et al. 2015). While providing profound insights, these  
510 few studies do not provide a comprehensive understanding of the epidemiological role of  
511 carriage quantity and the general lack of high-throughput tools for quantifying *S. aureus* in a  
512 sample has limited research efforts. We used SaQuant, a new qPCR assay with high sensitivity  
513 and specificity to more fully characterize carriage by documenting how carriage quantity varies  
514 across body sites, sex, and ethnicity in a large non-clinical cohort in southwestern Arizona.

515  
516 Efforts to mitigate *S. aureus* infections have been met with diminishing returns. Progress has  
517 certainly been made in reducing infections in healthcare environments, but perhaps the  
518 relatively high remnant infection rates are due to the persistence of small quantities in various  
519 body sites that go undetected despite screening and decolonization efforts. Our work  
520 demonstrates the importance of sensitive and quantitative detection in understanding carriage.  
521 Longitudinal sampling over a greater diversity of body sites and populations will be critical for  
522 more comprehensive understanding of colonization and will provide further guidance towards  
523 more effective prevention of *S. aureus* infections.

524

525 **Ethics approval and consent to participate**

526 Samples tested in this work were collected as a part of project 1116783 approved by the  
527 Northern Arizona University Institutional Review Board. Verbal consent or assent was obtained  
528 to maintain anonymity of participants.

529

530

## References

- 531 Asgeirsson, Hilmir, Anders Thalme, and Ola Weiland. 2017. “Staphylococcus Aureus  
532 Bacteraemia and Endocarditis – Epidemiology and Outcome: A Review.”  
533 <https://doi.org/10.1080/23744235.2017.1392039> 50 (3): 175–92.  
534 <https://doi.org/10.1080/23744235.2017.1392039>.
- 535 Barger, Steven D., Monica R. Lininger, Robert T. Trotter, Heidi A. Wayment, Mimi Mbegbu,  
536 Shari Kyman, and Talima Pearson. 2020. “Educational Attainment and *Staphylococcus*  
537 *Aureus* Colonization in a Hispanic Border Community: Testing Fundamental Cause  
538 Theory.” Edited by Paul D. Fey. *MSphere* 5 (5). <https://doi.org/10.1128/mSphere.00623-20>.
- 539 Calia, Frank M, Emanuel Wolinsky, Edward A Mortimer, Jerome S Abrams, and Charles H  
540 Ranmelkamp. 1969. “Staphylococcus Aureus in Wound Sepsis\*.” *J. Hyg., Camb.* Vol. 67.
- 541 Centers for Disease Control and Prevention. 2020. “Healthcare-Associated Infections –  
542 Community Interface Surveillance Report, Emerging Infections Program Network,  
543 Methicillin-Resistant Staphylococcus Aureus, 2017.” Available at:  
544 <https://www.cdc.gov/hai/eip/pdf/2017-MRSA-Report-508.pdf>.
- 545 Crandall, Hillary, Aurélie Kapusta, Jarrett Killpack, Carly Heyrend, Kody Nilsson, Mandy  
546 Dickey, Judy A. Daly, et al. 2020. “Clinical and Molecular Epidemiology of Invasive  
547 Staphylococcus Aureus Infection in Utah Children; Continued Dominance of MSSA over  
548 MRSA.” *PLOS ONE* 15 (9): e0238991. <https://doi.org/10.1371/JOURNAL.PONE.0238991>.
- 549 Curry, Jennifer A., Jason D. Maguire, Jamie Fraser, David R. Tribble, Robert G. Deiss, Coleman  
550 Bryan, Michele D. Tisdale, Katrina Crawford, Michael Ellis, and Tahaniyat Lalani. 2016.  
551 “Prevalence of Staphylococcus Aureus Colonization and Risk Factors for Infection among  
552 Military Personnel in a Shipboard Setting.” *Military Medicine* 181 (6): 524–29.  
553 <https://doi.org/10.7205/MILMED-D-15-00274>.
- 554 Ehrenkranz, N. Joel. 1964. “Person-to-Person Transmission of *Staphylococcus Aureus*.” *New*  
555 *England Journal of Medicine* 271 (5): 225–30.  
556 <https://doi.org/10.1056/NEJM196407302710503>.
- 557 Eiff, C von, K Becker, K Machka, H Stammer, G Peters, and Study Grp. 2001. “Nasal Carriage  
558 as a Source of Staphylococcus Aureus Bacteremia.” *New England Journal of Medicine* 344  
559 (1): 11–16. <https://doi.org/10.1056/Nejm200101043440102>.
- 560 Erikstrup, Lise Tornvig, Khoa Manh Dinh, Paal Skytt Andersen, Robert Leo Skov, Kathrine  
561 Agergård Kaspersen, Kaspar René Nielsen, Svend Ellermann-Eriksen, and Christian  
562 Erikstrup. 2019. “Cohort Description: The Danish Blood Donor Staphylococcus Aureus  
563 Carriage Study.” *Clinical Epidemiology* 11: 885–900.  
564 <https://doi.org/10.2147/CLEP.S218637>.
- 565 Gorwitz, Rachel J., Deanna Kruszon-Moran, Sigrid K. McAllister, Geraldine McQuillan, Linda  
566 K. McDougal, Gregory E. Fosheim, Bette J. Jensen, George Killgore, Fred C. Tenover, and  
567 Matthew J. Kuehnert. 2008. “Changes in the Prevalence of Nasal Colonization with

- 568 Staphylococcus Aureus in the United States, 2001–2004.” *The Journal of Infectious*  
569 *Diseases* 197 (9): 1226–34. <https://doi.org/10.1086/533494>.
- 570 Graham, P L, S X Lin, and E L Larson. 2006. “A US Population-Based Survey of  
571 Staphylococcus Aureus Colonization.” *Annals of Internal Medicine* 144 (5): 318–25.
- 572 Gualandi, Nicole, Yi Mu, Wendy M. Bamberg, Ghinwa Dumyati, Lee H. Harrison, Lindsey  
573 Leshner, Joelle Nadle, et al. 2018. “Racial Disparities in Invasive Methicillin-Resistant  
574 Staphylococcus Aureus Infections, 2005-2014.” *Clinical Infectious Diseases* 67 (8): 1175–  
575 81. <https://doi.org/10.1093/cid/ciy277>.
- 576 Hamdan-Partida, Aida, Teresita Sainz-Espuñes, and Jaime Bustos-Martínez. 2010.  
577 “Characterization and Persistence of Staphylococcus Aureus Strains Isolated from the  
578 Anterior Nares and Throats of Healthy Carriers in a Mexican Community.” *Journal of*  
579 *Clinical Microbiology* 48 (5): 1701–5. [https://doi.org/10.1128/JCM.01929-  
580 09/ASSET/28D324BA-33BD-4A48-BB1A-  
581 C237806C7134/ASSETS/GRAPHIC/ZJM9990997600002.JPEG](https://doi.org/10.1128/JCM.01929-09/ASSET/28D324BA-33BD-4A48-BB1A-C237806C7134/ASSETS/GRAPHIC/ZJM9990997600002.JPEG).
- 582 Heijer, Casper D.J. den, Evelien M.E. van Bijnen, W. John Paget, Mike Pringle, Herman  
583 Goossens, Cathrien A. Bruggeman, François G. Schellevis, and Ellen E. Stobberingh. 2013.  
584 “Prevalence and Resistance of Commensal Staphylococcus Aureus, Including Meticillin-  
585 Resistant S Aureus, in Nine European Countries: A Cross-Sectional Study.” *Lancet Infect*  
586 *Dis* 13 (5): 409–15. [https://doi.org/10.1016/s1473-3099\(13\)70036-7](https://doi.org/10.1016/s1473-3099(13)70036-7).
- 587 Hogan, Patrick G., Ryan L. Mork, Ryley M. Thompson, Carol E. Muenks, Mary G. Boyle,  
588 Melanie L. Sullivan, John J. Morelli, et al. 2020. “Environmental Methicillin-Resistant  
589 Staphylococcus Aureus Contamination, Persistent Colonization, and Subsequent Skin and  
590 Soft Tissue Infection.” *JAMA Pediatrics* 174 (6): 552–62.  
591 <https://doi.org/10.1001/jamapediatrics.2020.0132>.
- 592 Holtfreter, Silva, Dorothee Grumann, Veronika Balau, Annette Barwich, Julia Kolata, André  
593 Goehler, Stefan Weiss, et al. 2016. “Molecular Epidemiology of Staphylococcus Aureus in  
594 the General Population in Northeast Germany: Results of the Study of Health in Pomerania  
595 (SHIP-TREND-0).” *Journal of Clinical Microbiology* 54 (11): 2774–85.  
596 <https://doi.org/10.1128/JCM.00312-16>.
- 597 Jackson, Kelly A., Runa H. Gokhale, Joelle Nadle, Susan M. Ray, Ghinwa Dumyati, William  
598 Schaffner, David C. Ham, Shelley S. Magill, Ruth Lynfield, and Isaac See. 2020. “Public  
599 Health Importance of Invasive Methicillin-Sensitive Staphylococcus Aureus Infections:  
600 Surveillance in 8 US Counties, 2016.” *Clinical Infectious Diseases* 70 (6): 1021–28.  
601 <https://doi.org/10.1093/cid/ciz323>.
- 602 Kalmeijer, Mathijs D., Ella van Nieuwland-Bollen, Diane Bogaers-Hofman, Gerard A.J. de  
603 Baere, and Jan A.J.W. Kluytmans. 2000. “Nasal Carriage of Staphylococcus Aureus : Is a  
604 Major Risk Factor for Surgical-Site Infections in Orthopedic Surgery .” *Infection Control &*  
605 *Hospital Epidemiology* 21 (5): 319–23. <https://doi.org/10.1086/501763>.
- 606 Kluytmans, J. A. J. W., J. W. Mouton, E. P. F. Ijzerman, C. M. J. E. Vandenbroucke-Grauls, A.  
607 W. P. M. Maat, J. H. T. Wagenvoort, and H. A. Verbrugh. 1995. “Nasal Carriage Of  
608 Staphylococcus Aureus As A Major Risk Factor For Wound Infections After Cardiac  
609 Surgery.” *Journal of Infectious Diseases* 171 (1): 216–19.  
610 <https://doi.org/10.1093/infdis/171.1.216>.
- 611 Kluytmans, Jan, Alex van Belkum, and Henri Verbrugh. 1997. “Nasal Carriage of  
612 Staphylococcus Aureus: Epidemiology, Underlying Mechanisms, and Associated Risks.”  
613 *Clinical Microbiology Reviews*. <https://doi.org/10.1128/cmr.10.3.505>.

- 614 Koeck, Mackenzie, Kathryn Como-Sabetti, Dave Boxrud, Ginette Dobbins, Anita Glennen,  
615 Melissa Anacker, Selina Jawahir, Isaac See, and Ruth Lynfield. 2019. “Burdens of Invasive  
616 Methicillin-Susceptible and Methicillin-Resistant Staphylococcus Aureus Disease,  
617 Minnesota, USA.” *Emerging Infectious Diseases* 25 (1): 171–74.  
618 <https://doi.org/10.3201/eid2501.181146>.
- 619 Kourtis, A P, K Hatfield, J Baggs, Y Mu, I See, E Epton, J Nadle, et al. 2019. “Vital Signs:  
620 Epidemiology and Recent Trends in Methicillin-Resistant and in Methicillin-Susceptible  
621 Staphylococcus Aureus Bloodstream Infections - United States.” *MMWR Morb Mortal*  
622 *Wkly Rep* 68 (9): 214–19. <https://doi.org/10.15585/mmwr.mm6809e1>.
- 623 Kuehnert, Matthew J., Deanna Kruszon-Moran, Holly A. Hill, Geraldine McQuillan, Sigrid K.  
624 McAllister, Gregory Fosheim, Linda K. McDougal, et al. 2006. “Prevalence of  
625 Staphylococcus Aureus Nasal Colonization in the United States, 2001-2002.” *Journal of*  
626 *Infectious Diseases* 193 (2): 172–79. <https://doi.org/10.1086/499632>.
- 627 Liu, Cindy M., Lance B. Price, Bruce A. Hungate, Alison G. Abraham, Lisbeth A. Larsen, Kaare  
628 Christensen, Marc Stegger, Robert Skov, and Paal Skytt Andersen. 2015. “Staphylococcus  
629 Aureus and the Ecology of the Nasal Microbiome.” *Science Advances* 1 (5).  
630 <https://doi.org/10.1126/sciadv.1400216>.
- 631 Mainous, Arch G., William J. Hueston, Charles J. Everett, and Vanessa A. Diaz. 2006. “Nasal  
632 Carriage of Staphylococcus Aureus and Methicillin-Resistant S Aureus in the United States,  
633 2001-2002.” *Annals of Family Medicine*. The Annals of Family Medicine.  
634 <https://doi.org/10.1370/afm.526>.
- 635 Mermel, Leonard A., Jennifer M. Cartony, Pauline Covington, Gail Maxey, and Dan Morse.  
636 2011. “Methicillin-Resistant Staphylococcus Aureus Colonization at Different Body Sites:  
637 A Prospective, Quantitative Analysis.” *Journal of Clinical Microbiology* 49 (3): 1119–21.  
638 <https://doi.org/10.1128/JCM.02601-10>.
- 639 Nilsson, Peter, and Torvald Ripa. 2006. “Staphylococcus Aureus Throat Colonization Is More  
640 Frequent than Colonization in the Anterior Nares.” *Journal of Clinical Microbiology* 44 (9):  
641 3334–39. [https://doi.org/10.1128/JCM.00880-06/ASSET/F24F1A1A-5300-4760-8823-  
642 20DD84A413D3/ASSETS/GRAPHIC/ZJM0090667160003.JPEG](https://doi.org/10.1128/JCM.00880-06/ASSET/F24F1A1A-5300-4760-8823-20DD84A413D3/ASSETS/GRAPHIC/ZJM0090667160003.JPEG).
- 643 Panisello Yagüe, David, Joseph Mihaljevic, Mimi Mbegbu, Colin v. Wood, Crystal Hepp, Shari  
644 Kyman, Heidie Hornstra, Robert Trotter, Emily Cope, and Talima Pearson. 2021. “Survival  
645 of *Staphylococcus Aureus* on Sampling Swabs Stored at Different Temperatures.” *Journal*  
646 *of Applied Microbiology*, February. <https://doi.org/10.1111/jam.15023>.
- 647 Pearson, Talima, Steven D Barger, Monica Lininger, Heidi Wayment, Crystal Hepp, Francisco  
648 Villa, Kara Tucker-Morgan, et al. 2019. “Health Disparities in Staphylococcus Aureus  
649 Transmission and Carriage in a Border Region of the United States Based on Cultural  
650 Differences in Social Relationships: Protocol for a Survey Study.” *JMIR Research*  
651 *Protocols* 8 (9): e14853. <https://doi.org/10.2196/14853>.
- 652 Pearson, Talima, Crystal Hepp, Robert T. Trotter, Mimi Mbegbu, Benjamin Russakoff, David  
653 Panisello Yagüe, Colin Wood, et al. 2021. “Genome Sequences of Community Carriage  
654 Strains of Staphylococcus Aureus from Yuma, Arizona.” Edited by Steven R. Gill.  
655 *Microbiology Resource Announcements* 10 (37). <https://doi.org/10.1128/MRA.00449-21>.
- 656 R Core Team. 2018. “R: A Language and Environment for Statistical Computing.” R Foundation  
657 for Statistical Computing, Vienna, Austria. Available online at <https://www.R-project.org/>.
- 658 Reagan, D. R., B. N. Doebbeling, M. A. Pfaller, C. T. Sheetz, A. K. Houston, R. J. Hollis, and R.  
659 P. Wenzel. 1991. “Elimination of Coincident Staphylococcus Aureus Nasal and Hand

- 660 Carriage with Intranasal Application of Mupirocin Calcium Ointment.” *Annals of Internal*  
661 *Medicine* 114 (2): 101–6. <https://doi.org/10.7326/0003-4819-114-2-101>.
- 662 Rohr, Ute, M. Wilhelm, G. Muhr, and S. Gatermann. 2004. “Qualitative and (Semi)Quantitative  
663 Characterization of Nasal and Skin Methicillin-Resistant Staphylococcus Aureus Carriage  
664 of Hospitalized Patients.” *International Journal of Hygiene and Environmental Health* 207  
665 (1): 51–55. <https://doi.org/10.1078/1438-4639-00266>.
- 666 Senn, L., P. Basset, I. Nahimana, G. Zanetti, and D. S. Blanc. 2012. “Which Anatomical Sites  
667 Should Be Sampled for Screening of Methicillin-Resistant Staphylococcus Aureus Carriage  
668 by Culture or by Rapid PCR Test?” *Clinical Microbiology and Infection* 18 (2): E31–33.  
669 <https://doi.org/10.1111/J.1469-0691.2011.03724.X>.
- 670 Sollid, J. U.E., A. S. Furberg, A. M. Hanssen, and M. Johannessen. 2014. “Staphylococcus  
671 Aureus: Determinants of Human Carriage.” *Infection, Genetics and Evolution* 21 (January):  
672 531–41. <https://doi.org/10.1016/j.meegid.2013.03.020>.
- 673 Tong, Steven Y.C., Joshua S. Davis, Emily Eichenberger, Thomas L. Holland, and Vance G.  
674 Fowler. 2015. “Staphylococcus Aureus Infections: Epidemiology, Pathophysiology,  
675 Clinical Manifestations, and Management.” *Clinical Microbiology Reviews* 28 (3): 603–61.  
676 <https://doi.org/10.1128/CMR.00134-14>.
- 677 VandenBergh, Marjolein F.Q., Ed P.F. Yzerman, Alex van Belkum, H el ene A.M. Boelens,  
678 Marly Sijmons, and Henri A. Verbrugh. 1999. “Follow-up of Staphylococcus Aureus Nasal  
679 Carriage after 8 Years: Redefining the Persistent Carrier State.” *Journal of Clinical*  
680 *Microbiology* 37 (10): 3133–40. <https://doi.org/10.1128/jcm.37.10.3133-3140.1999>.
- 681 Wertheim, Heiman F.L., Damian C. Melles, Margreet C. Vos, Willem van Leeuwen, Alex van  
682 Belkum, Henri A. Verbrugh, and Jan L. Nouwen. 2005. “The Role of Nasal Carriage in  
683 Staphylococcus Aureus Infections.” *Lancet Infectious Diseases*.  
684 [https://doi.org/10.1016/S1473-3099\(05\)70295-4](https://doi.org/10.1016/S1473-3099(05)70295-4).
- 685 White, Arthur. 1961a. “Quantitative Studies of Nasal Carriers of Staphylococci among  
686 Hospitalized Patients.” *The Journal of Clinical Investigation* 40 (1): 23–30.  
687 <https://doi.org/10.1172/JCI104233>.
- 688 ———. 1961b. “Relation between Quantitative Nasal Cultures and Dissemination of  
689 Staphylococci.” *J Lab Clin Med* 40 (1): 23–30.
- 690 ———. 1963. “Increased Infection Rates in Heavy Nasal Carriers of Coagulase-Positive  
691 Staphylococci.” *Antimicrob Agents Chemother* 30: 667–70.  
692 [https://repub.eur.nl/pub/7622/07\\_12.pdf](https://repub.eur.nl/pub/7622/07_12.pdf).
- 693 Wickham, Hadley. 2016. *Ggplot2: Elegant Graphics for Data Analysis*. Use R! Cham: Springer  
694 International Publishing. <https://doi.org/10.1007/978-3-319-24277-4>.
- 695 Williams, R. E. O. 1963. “Healthy Carriage of Staphylococcus Aureus: Its Prevalence and  
696 Importance.” *Bacteriological Reviews* 27 (1): 56–71.  
697 <https://doi.org/10.1128/MMBR.27.1.56-71.1963>.
- 698 Wood, Colin, Jason Sahl, Sara Maltinsky, Briana Coyne, Benjamin Russakoff, David Panisello  
699 Yag ue, Jolene Bowers, and Talima Pearson. 2021. “SaQuant: A Real-Time PCR Assay for  
700 Quantitative Assessment of Staphylococcus Aureus.” *BMC Microbiology* 21 (1): 174.  
701 <https://doi.org/10.1186/s12866-021-02247-6>.
- 702 Young, B. C., A. A. Votintseva, D. Foster, H. Godwin, R. R. Miller, L. W. Anson, A. S. Walker,  
703 T. E.A. Peto, D. W. Crook, and K. Knox. 2017. “Multi-Site and Nasal Swabbing for  
704 Carriage of Staphylococcus Aureus: What Does a Single Nose Swab Predict?” *Journal of*  
705 *Hospital Infection* 96 (3): 232–37. <https://doi.org/10.1016/j.jhin.2017.01.015>.

706 Zhang, Zheng, Scott Schwartz, Lukas Wagner, and Webb Miller. 2000. “A Greedy Algorithm  
707 for Aligning DNA Sequences.” *Journal of Computational Biology : A Journal of*  
708 *Computational Molecular Cell Biology* 7 (1–2): 203–14.  
709 <https://doi.org/10.1089/10665270050081478>.  
710



**A**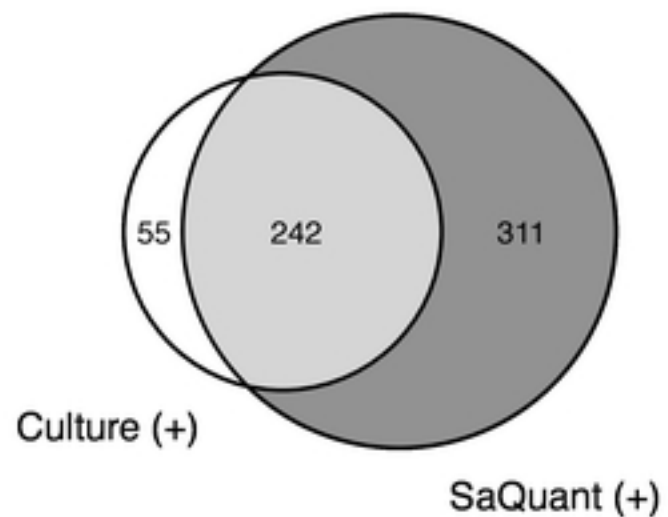**B**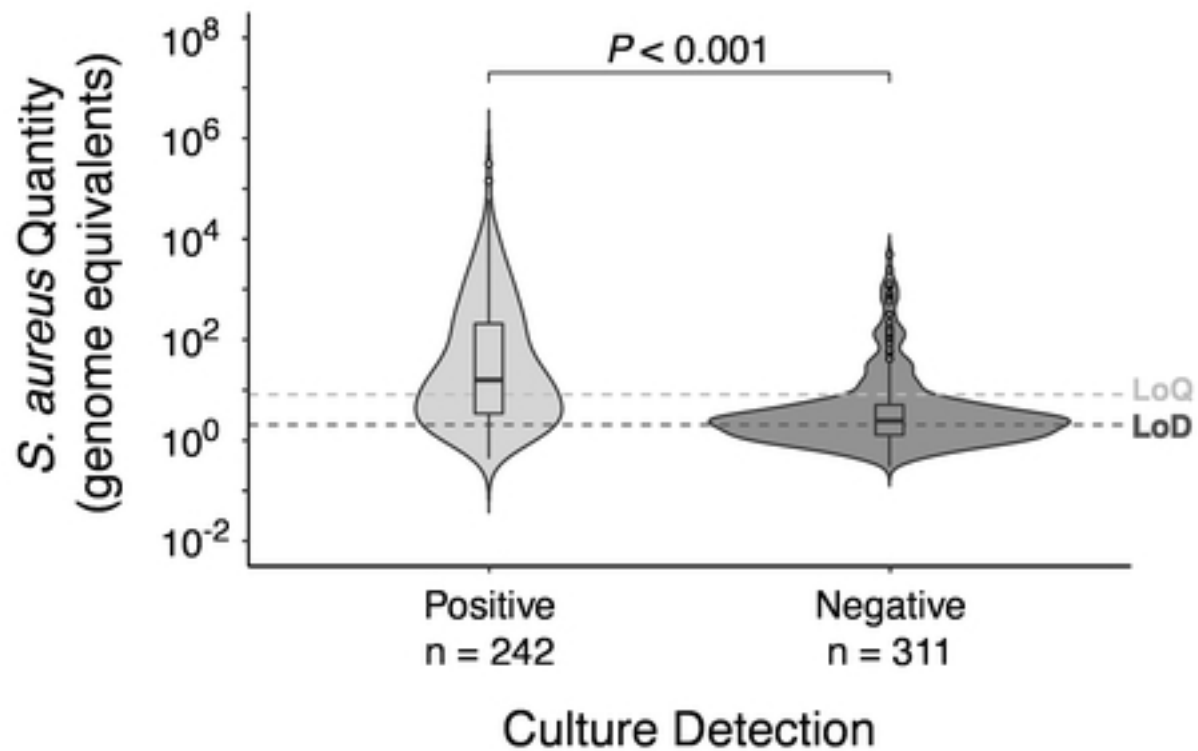

Fig1

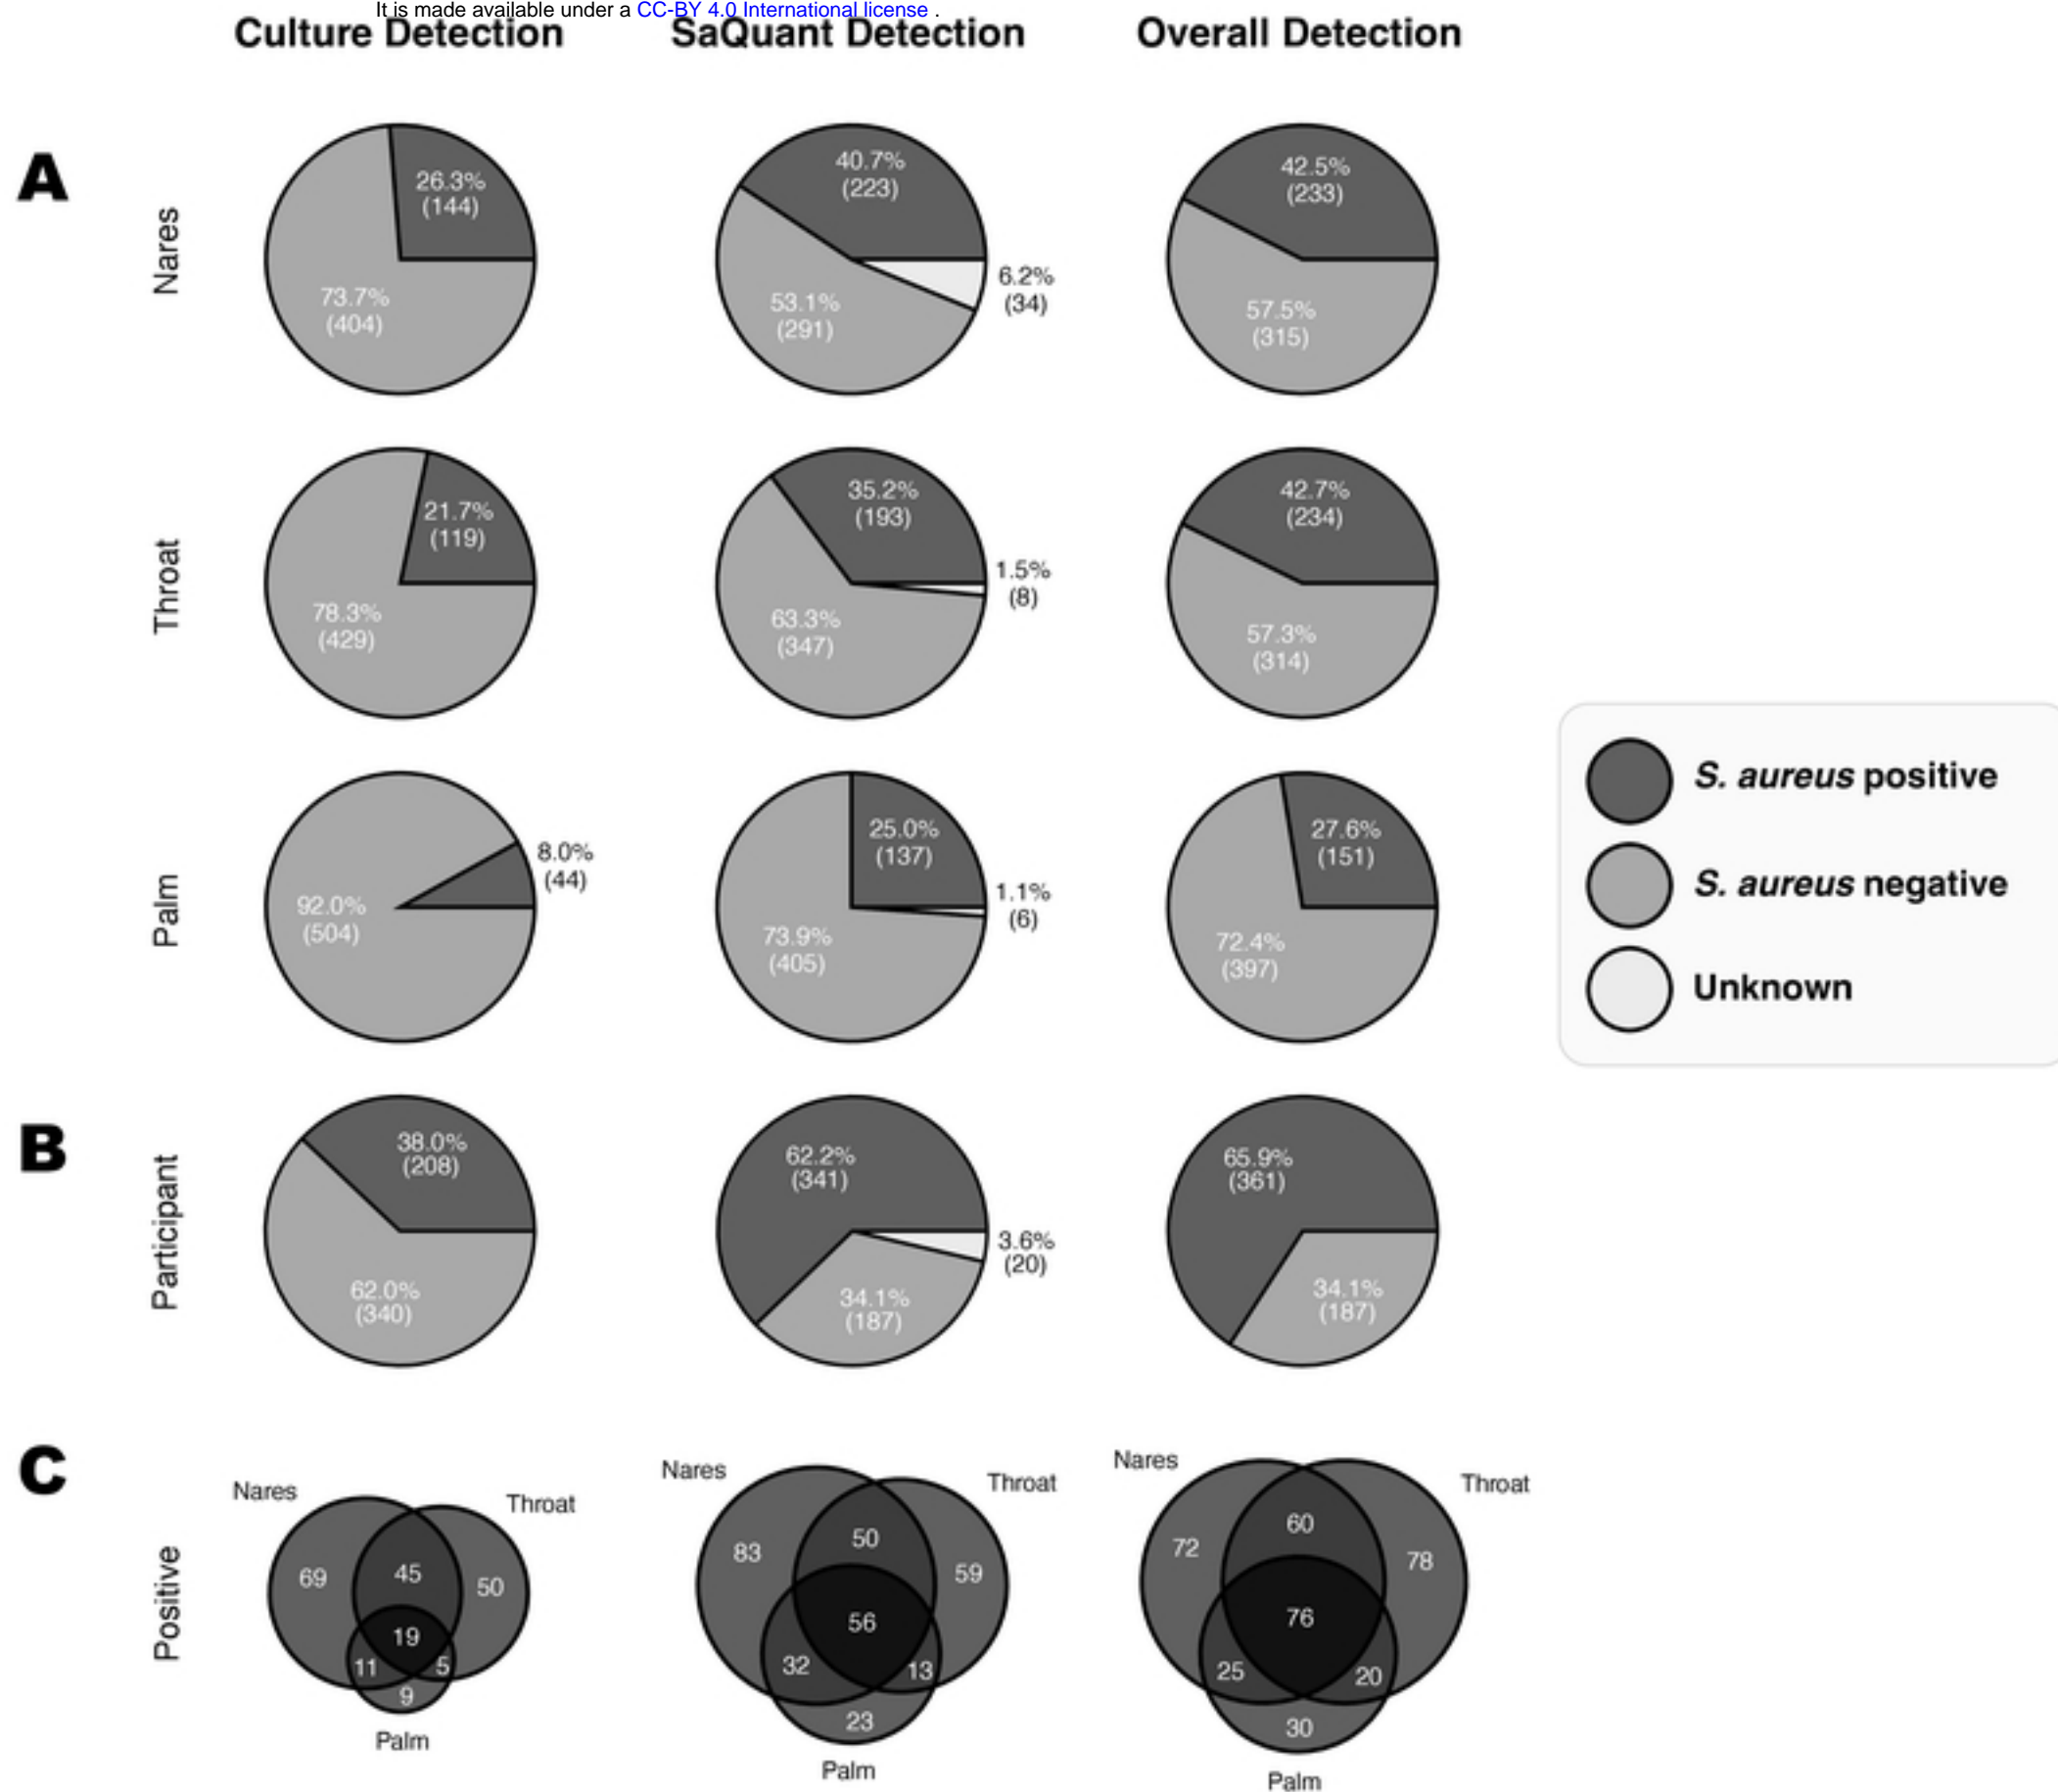

Fig2

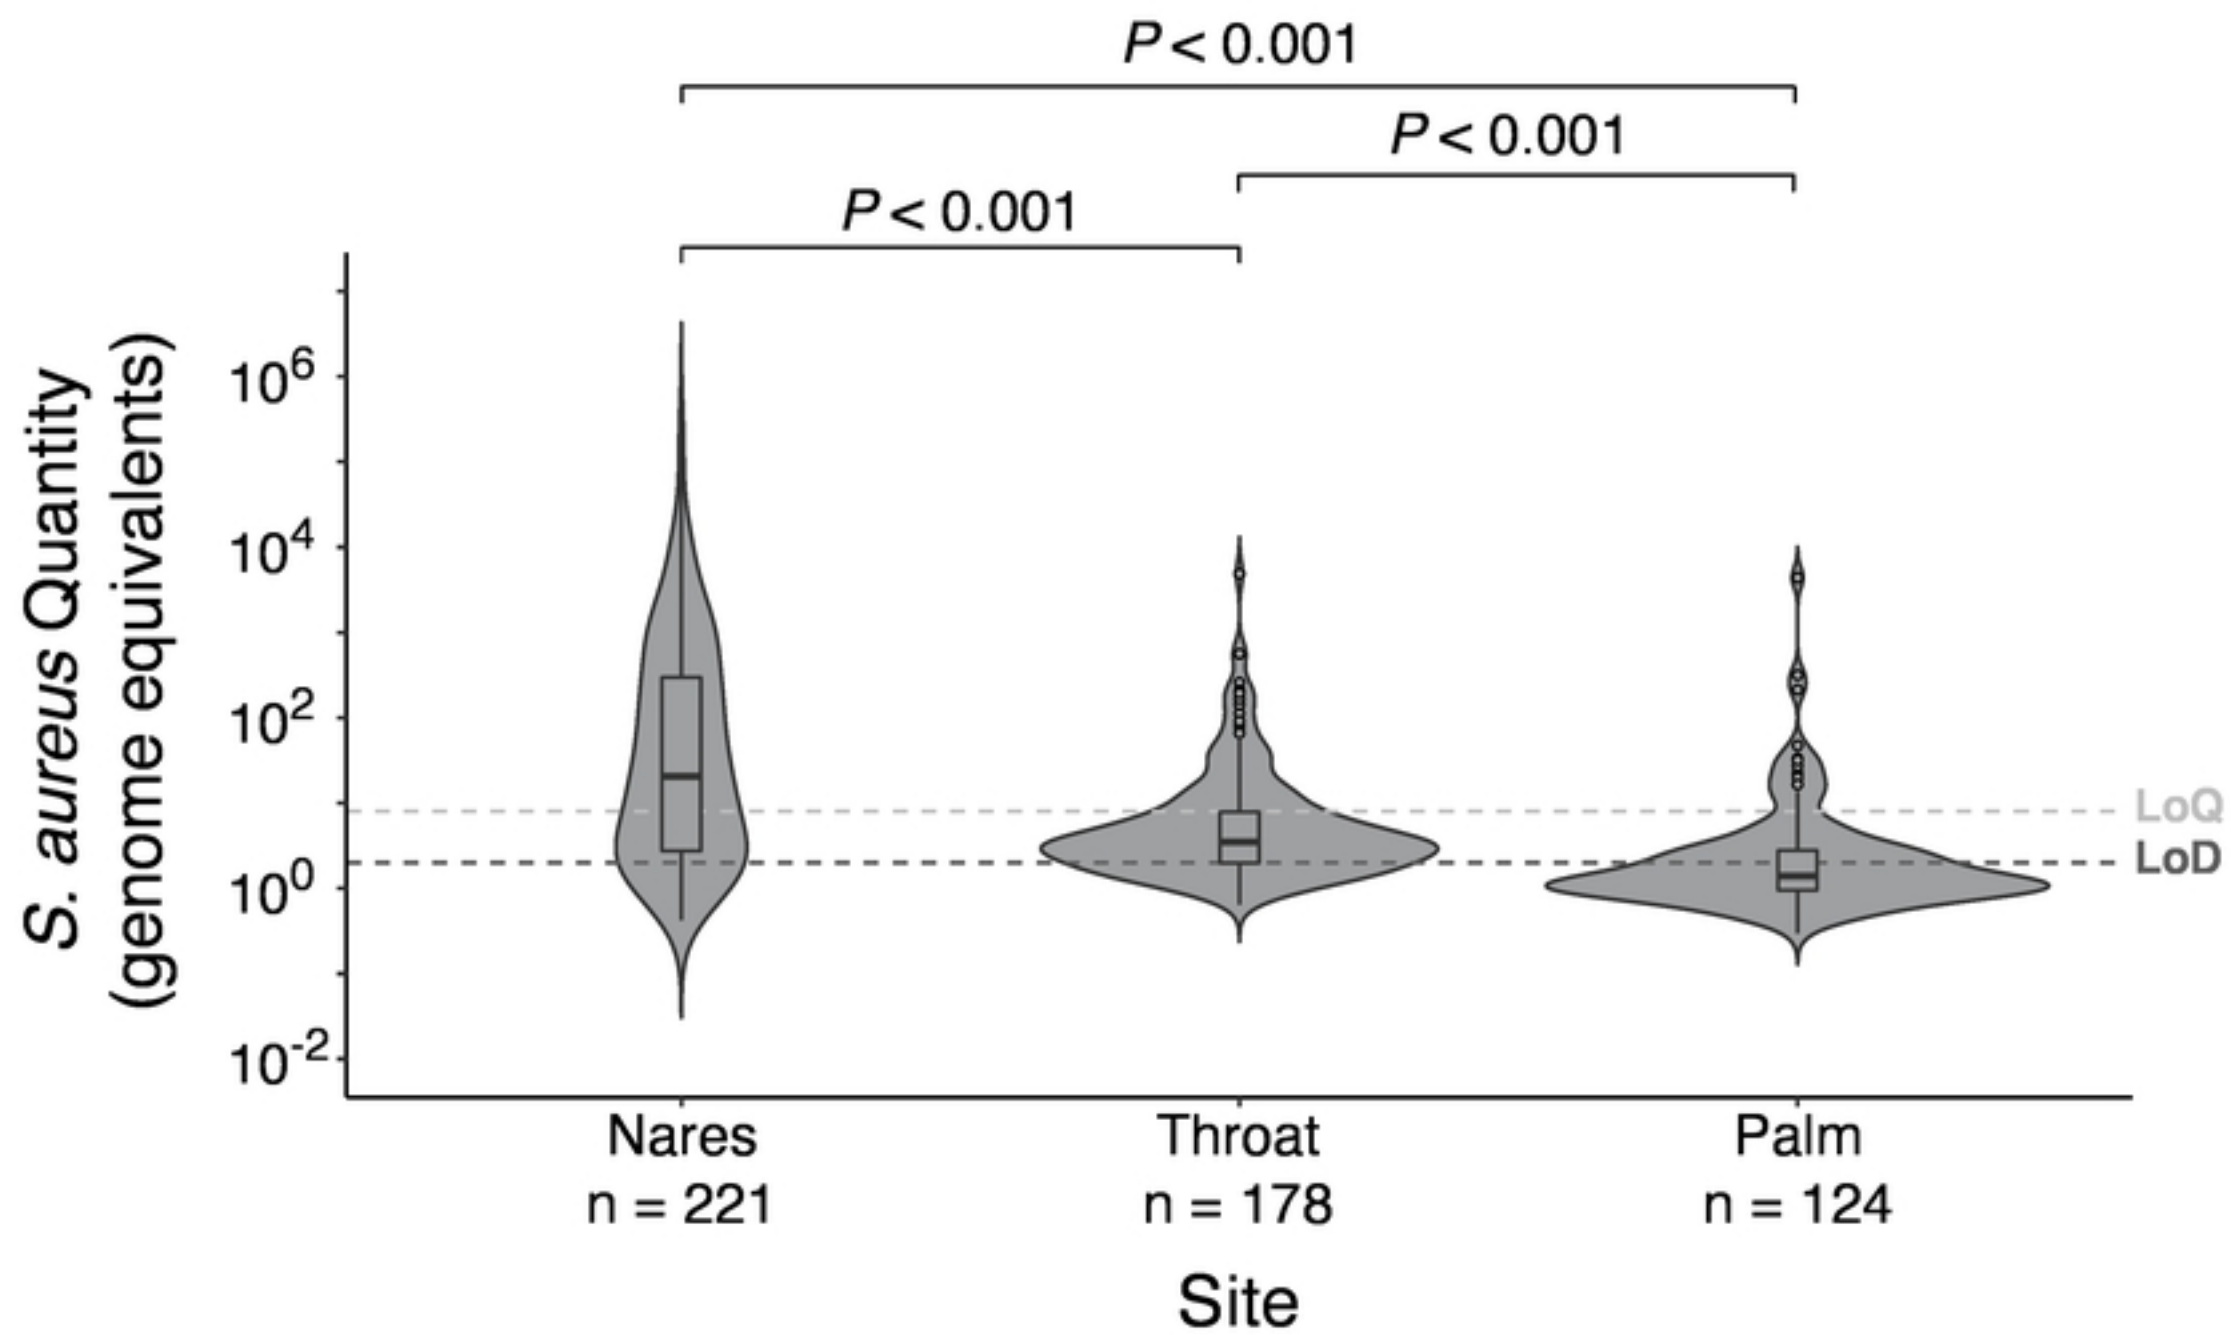

Fig3

**A**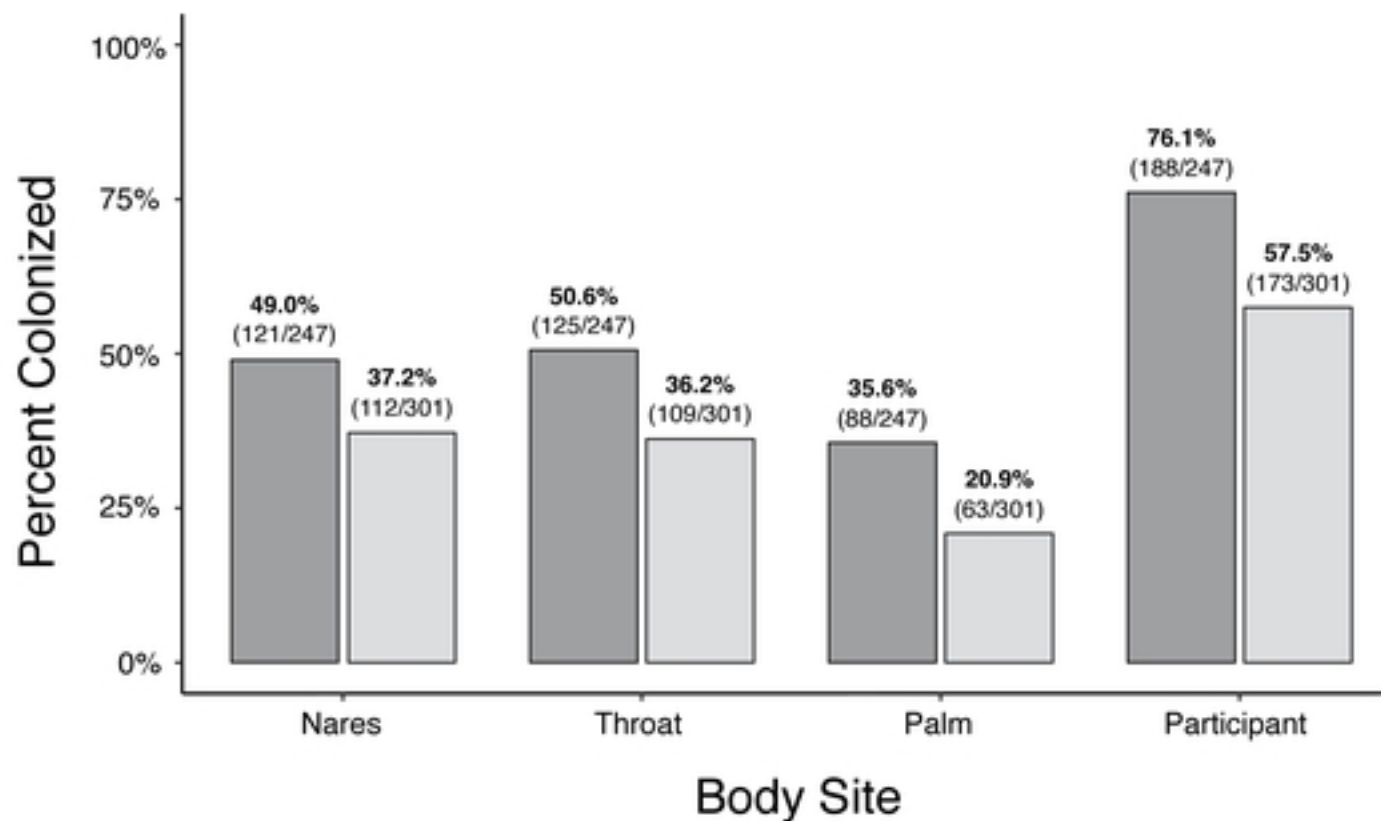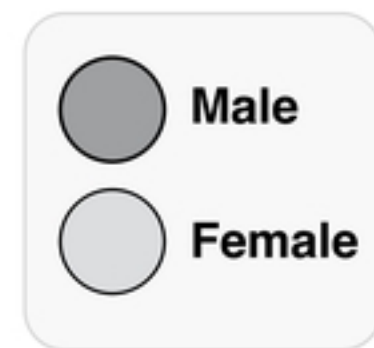**B**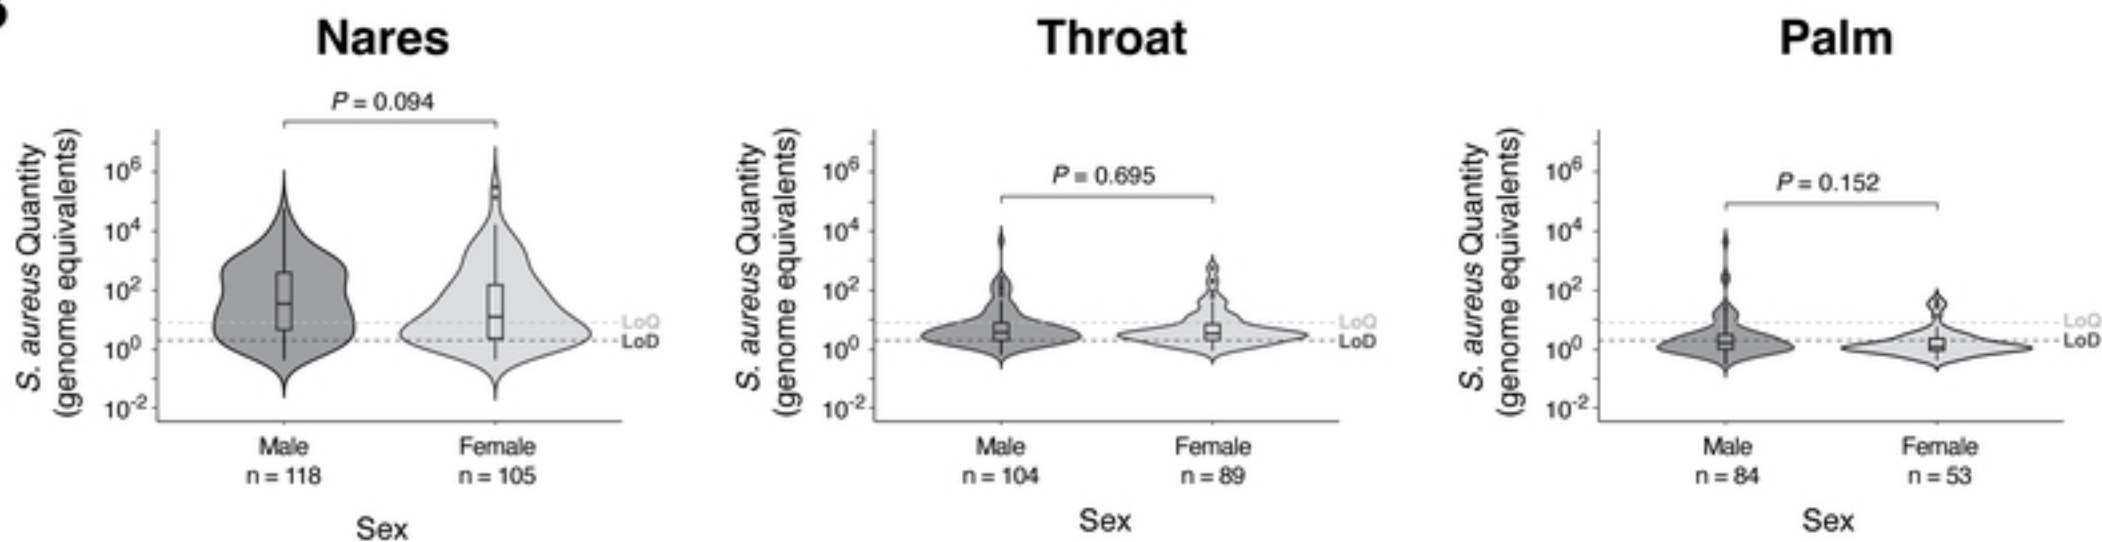

Fig4

**A**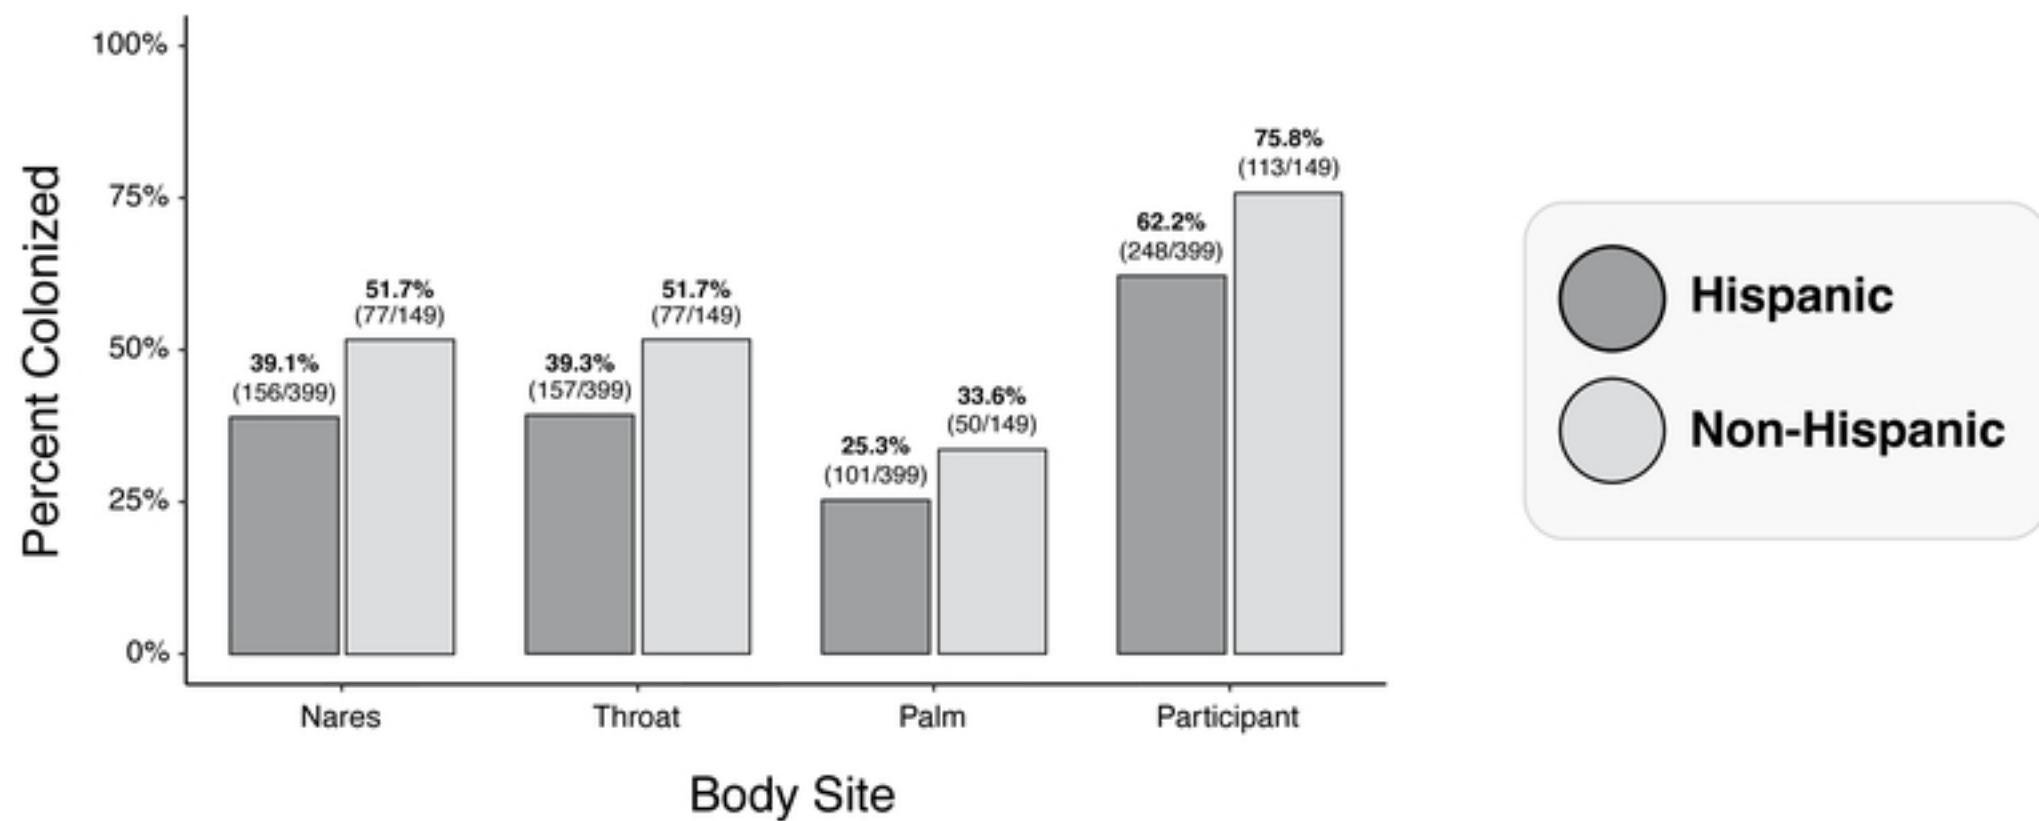**B**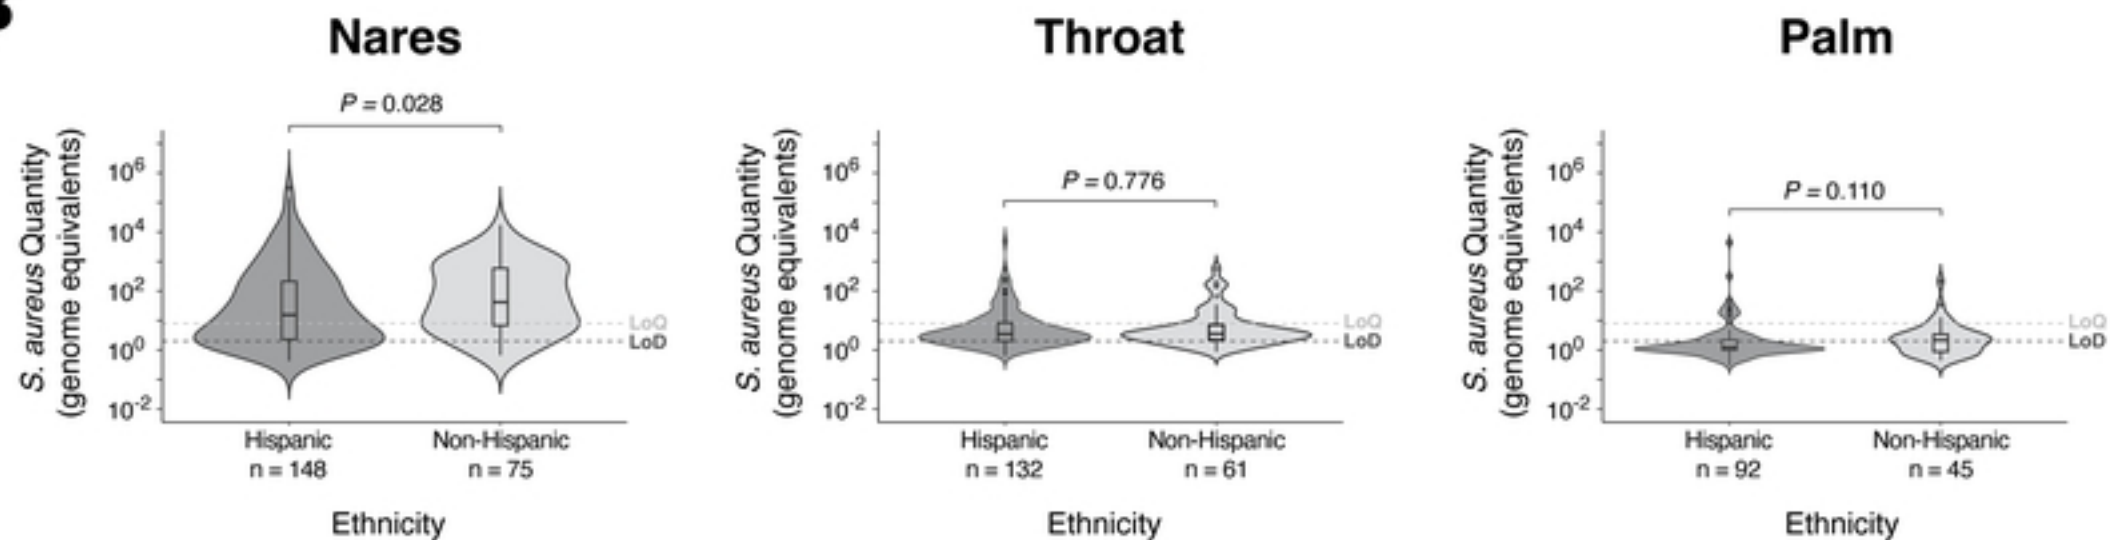

**A**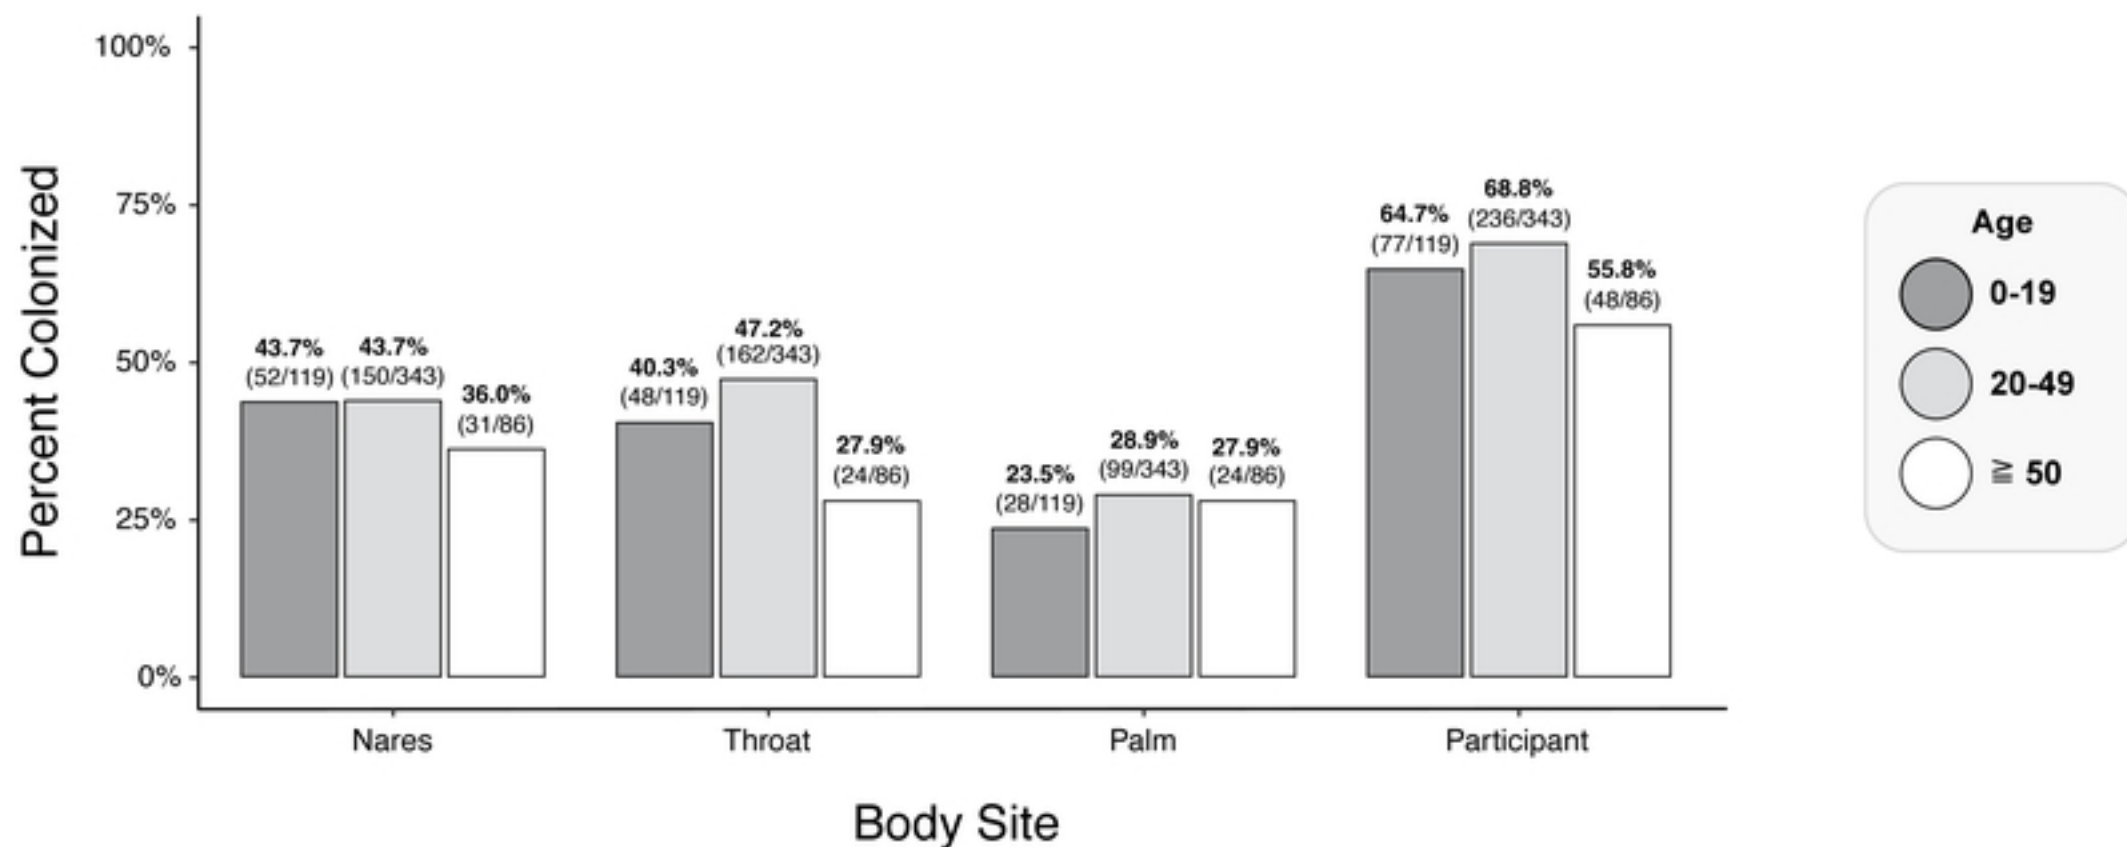**B**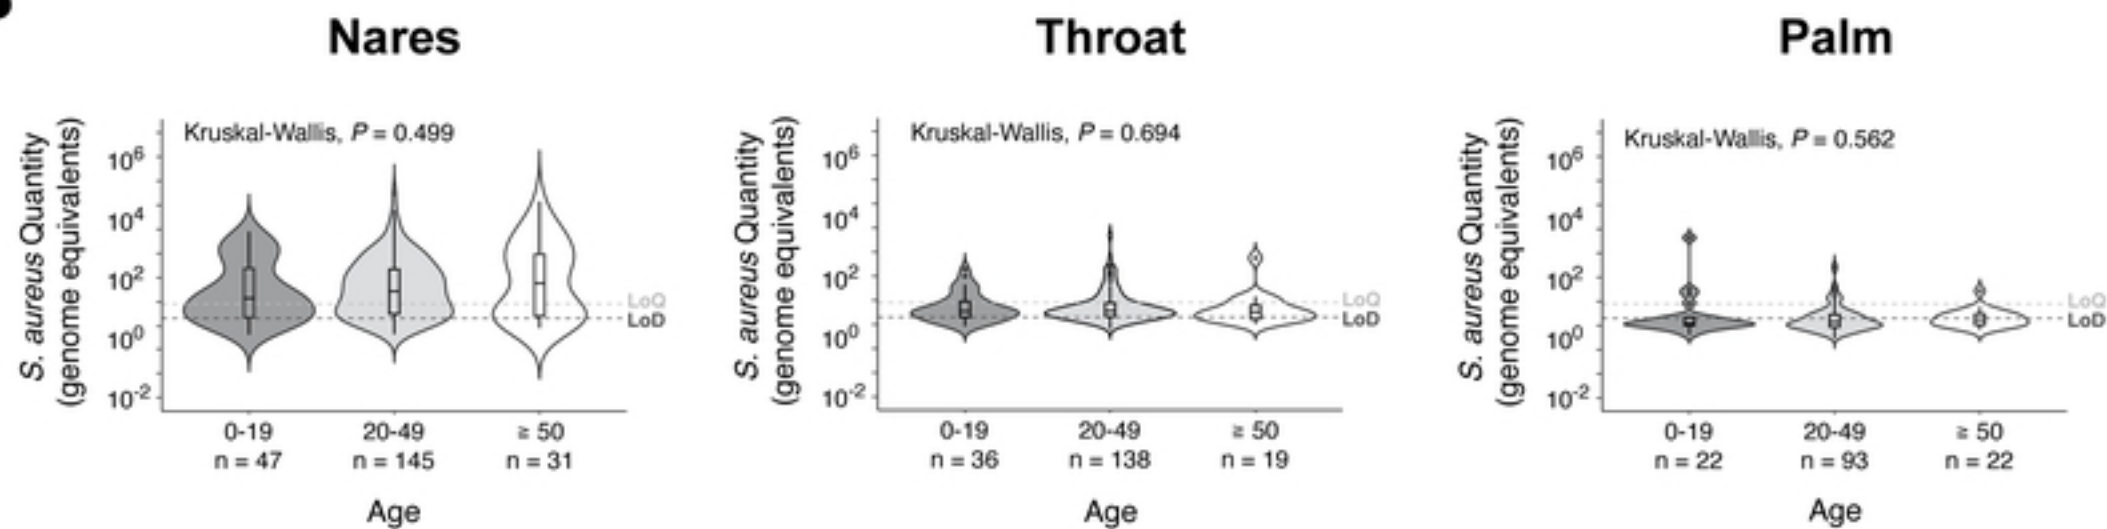

Fig6

**A**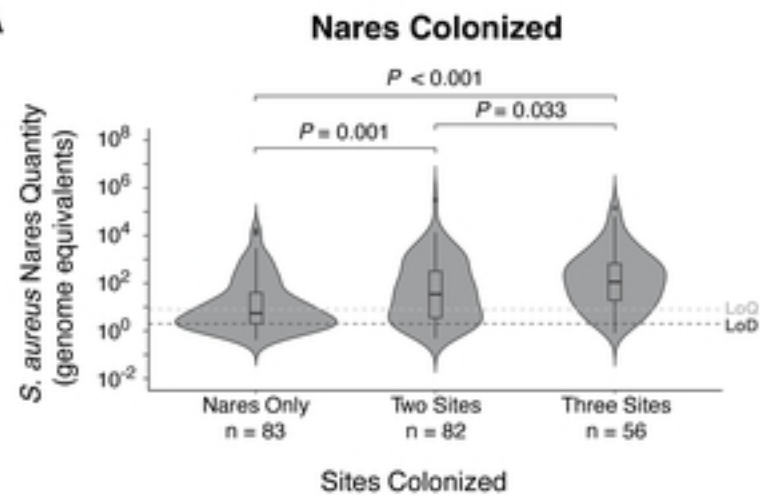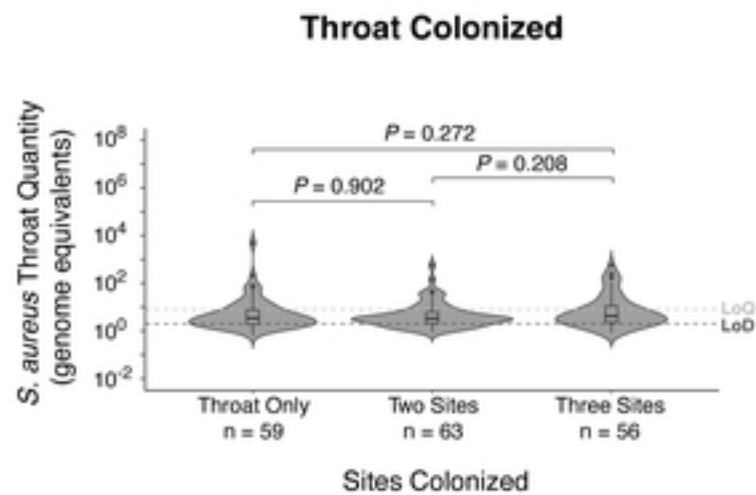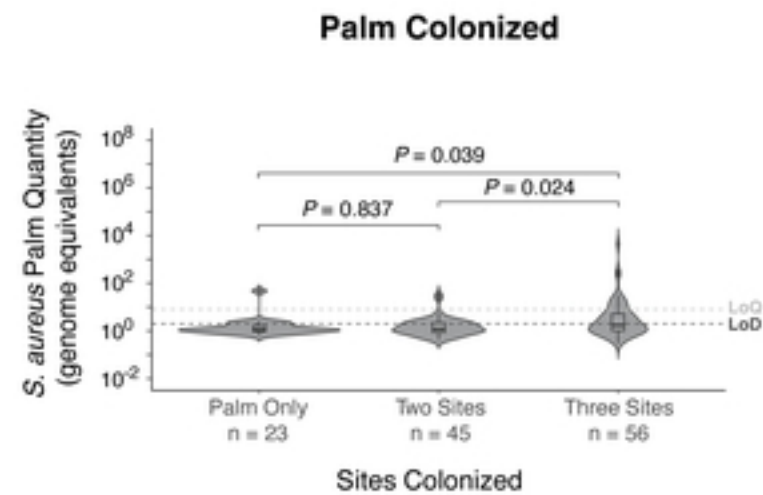**B**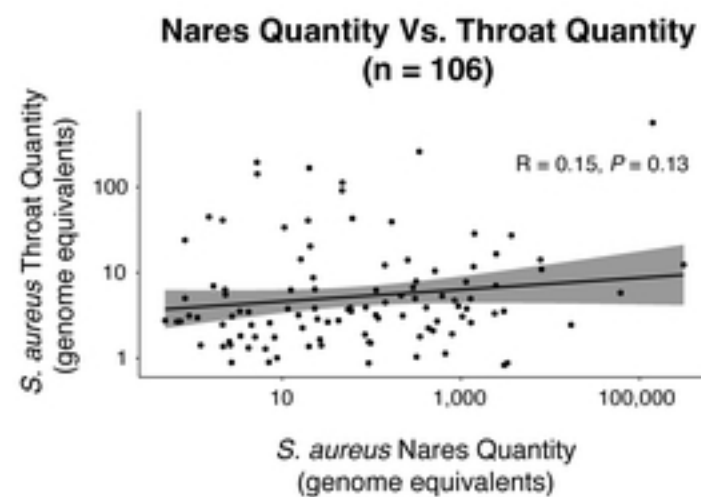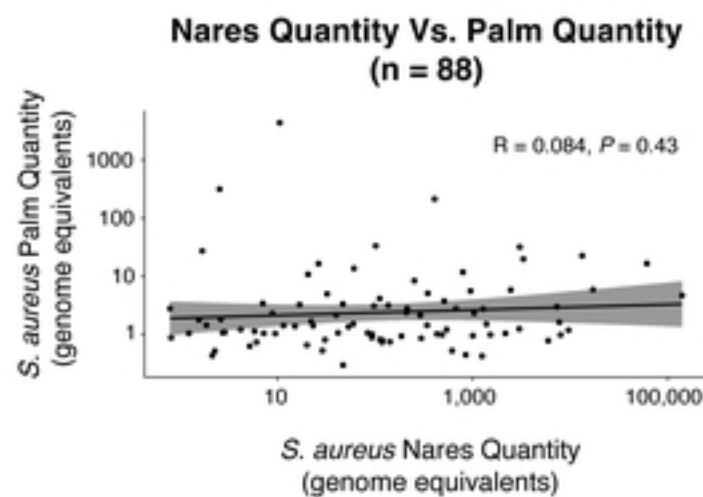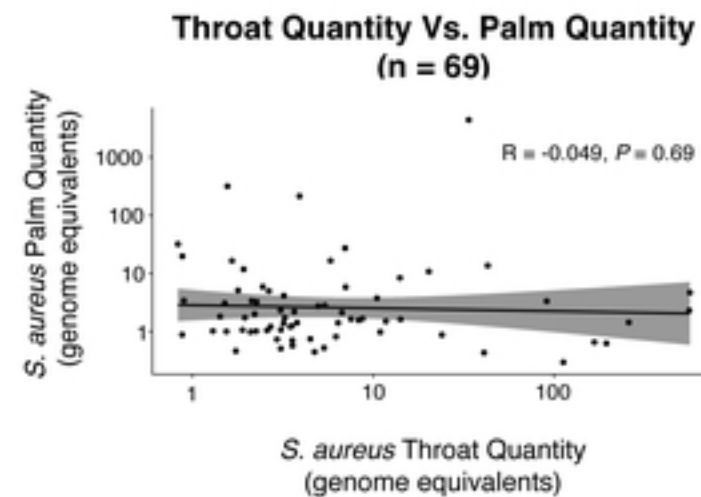

Source: https://medrxiv.org/content/10.1101/2022.05.24.22275524v1.full.pdf
